# Supplementary material
Source: PubMed Central journal article supplement (PMC5142122)
Supplement: mmc1.pdf [file mmc1.pdf]

**The American Journal of Human Genetics, Volume 99**

## **Supplemental Data**

### **Colocalization of GWAS and eQTL**

#### **Signals Detects Target Genes**

**Farhad Hormozdiari, Martijn van de Bunt, Ayellet V. Segrè, Xiao Li, Jong Wha J. Joo, Michael Bilow, Jae Hoon Sul, Sriram Sankararaman, Bogdan Pasaniuc, and Eleazar Eskin**

## Supplemental Data

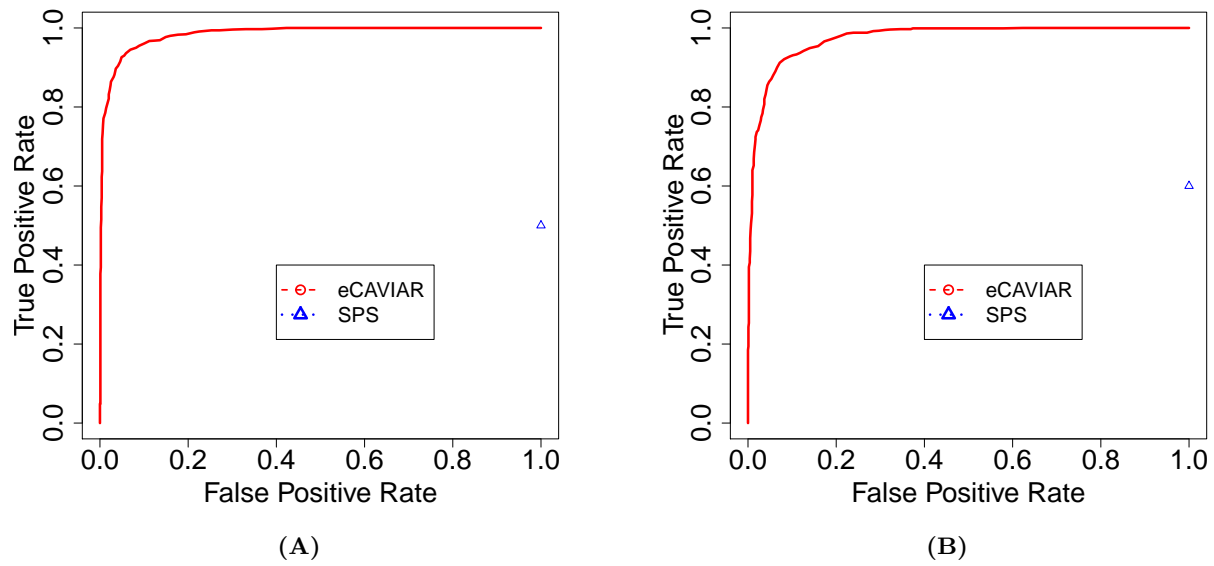

**Figure S1.** ROC curve computed for the same results as shown in Figures 3A and 3B where we generate the marginal statistics directly from the LD structure and we implant one causal variant in the locus. The x-axis is the false positive rate and the y-axis is the true positive rate. Panels (A) and (B) indicate the result for the case we have 50% and 80% for the causal variant, respectively.

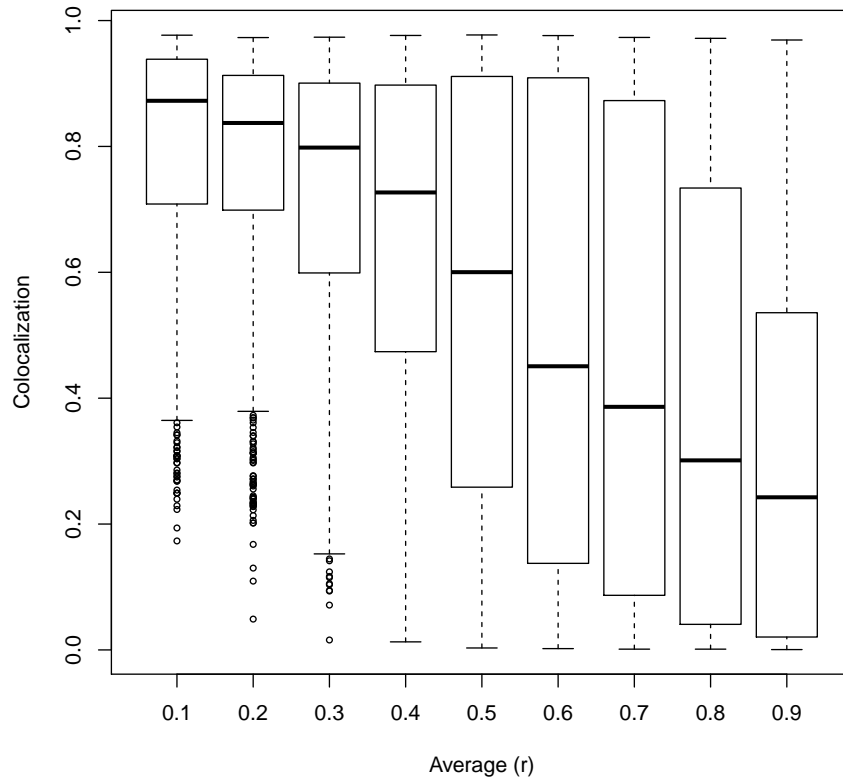

**Figure S2.** eCAVIAR quantification of CLPP depends on LD. We compute the probability of the same variant is causal in both GWAS and eQTL as we vary the Pearson's correlation between pair of variants. We observe that as we increase the correlation, which increase the LD complexity, the CLPP value decreases and the variance of the computed CLPP increases. We simulate datasets where we range the average Pearson's correlation between pair of variants from 0.1 to 0.9. In this setting, we implant only one causal variant in the same variant for both eQTL and GWAS. The NCP is set such that we have 50% power. Then, we simulate the marginal statistics for 1000 times.

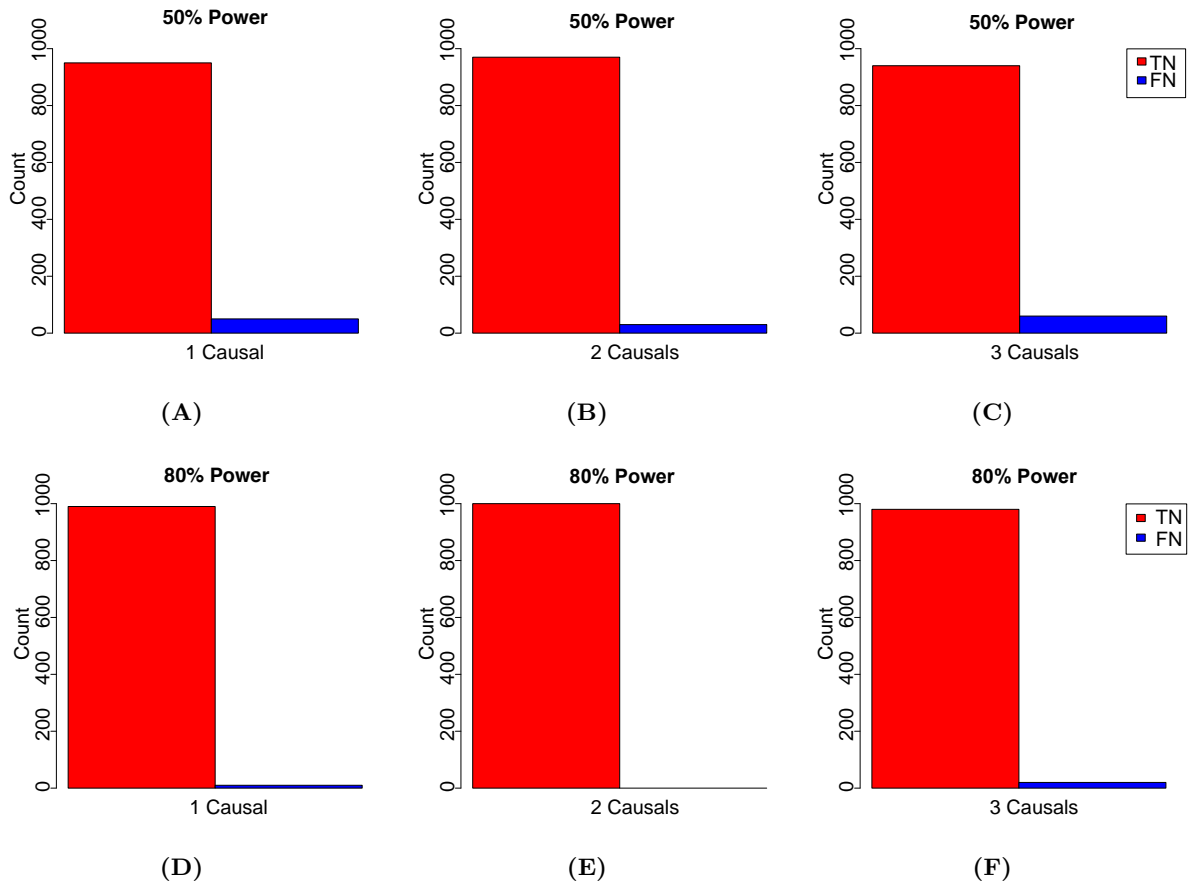

**Figure S3.** eCAVIAR has high true negative (TN) rate and low false negative (FN) rate. We set the non-colocalization cut-off threshold to 0.01%

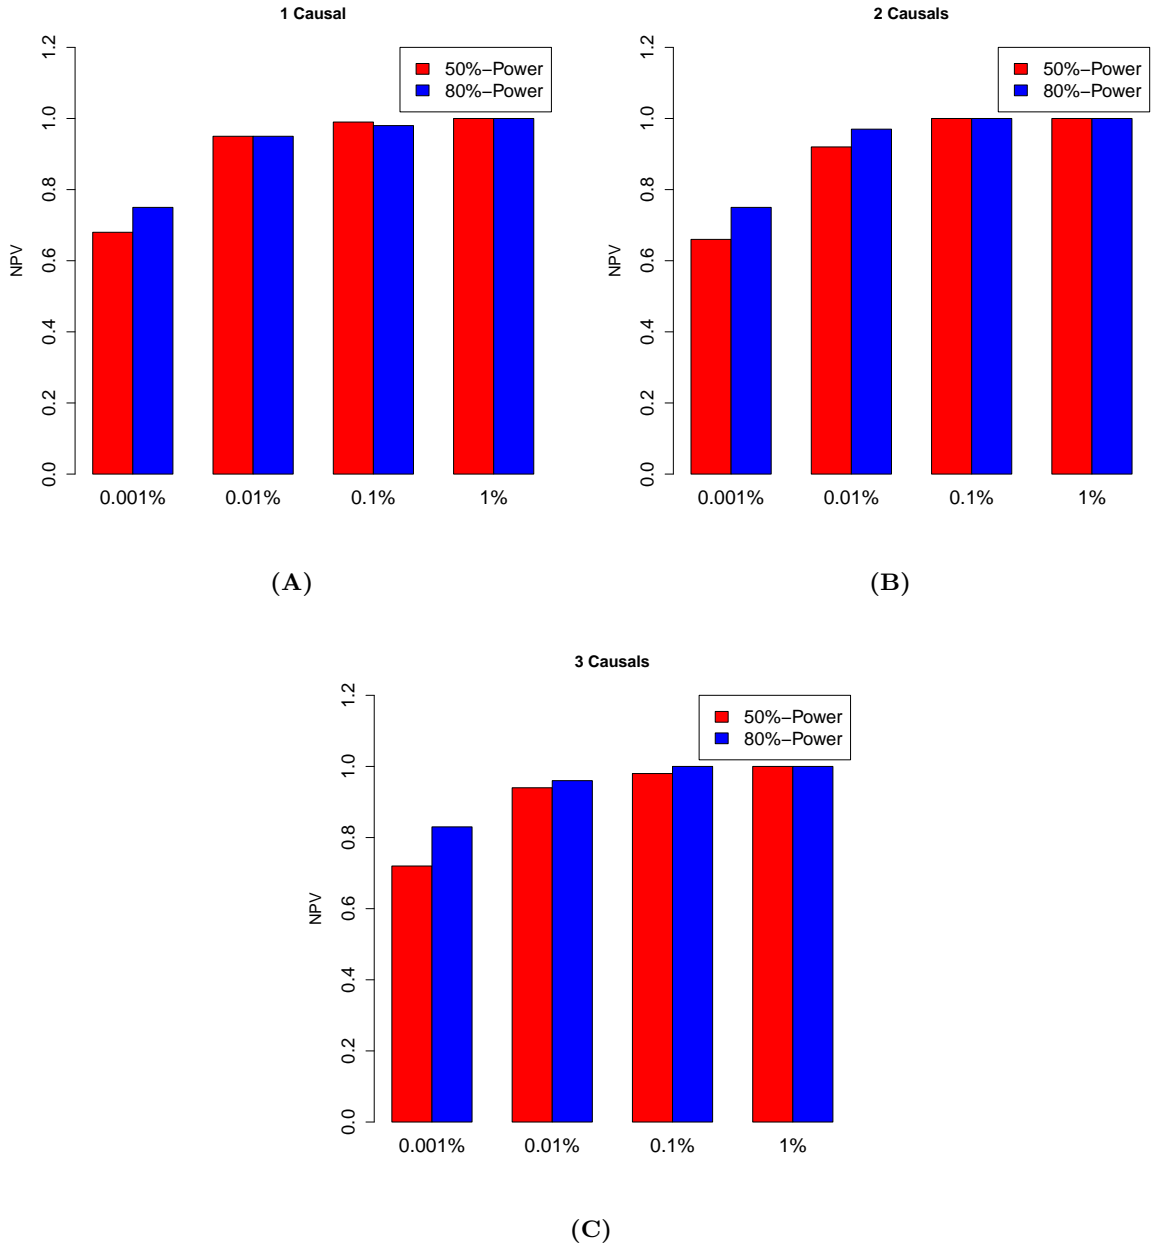

**Figure S4.** eCAVIAR has high negative predictive value (NPV). Panels (A), (B), and (C) illustrate the results for cases where we implant one, two, and three causal variants, respectively. We set NCP such that the statistical power at the causal variant is 50% or 80%.

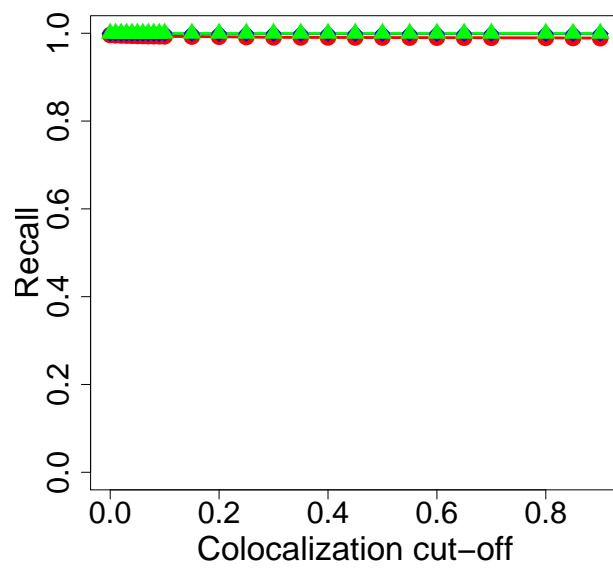

(A)

**Figure S5.** eCAVIAR, RTC, and COLOC have similar recall rate in the case where we have one causal variant in a locus. The x-axis is the colocalization cut-off threshold. We set the non-colocalization cut-off threshold to 0.1%.

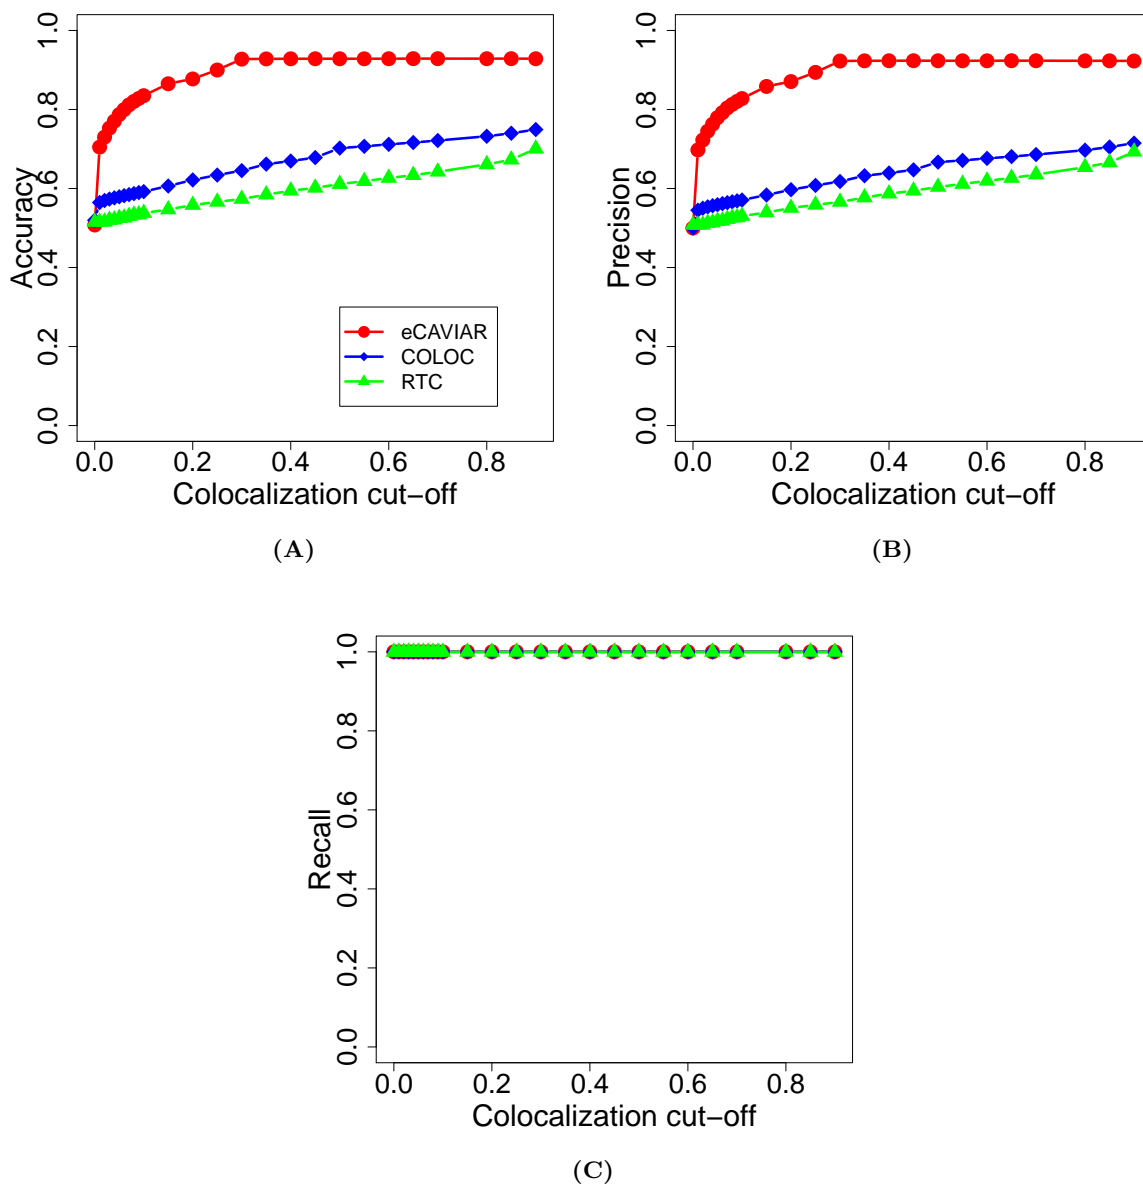

**Figure S6.** eCAVIAR is more accurate than existing methods for regions with one causal variant. We compared the accuracy and precision of eCAVIAR with the two existing methods (RTC and COLOC). The x-axis is the colocalization cut-off threshold. We set the non-colocalization cut-off threshold to 0.01%.

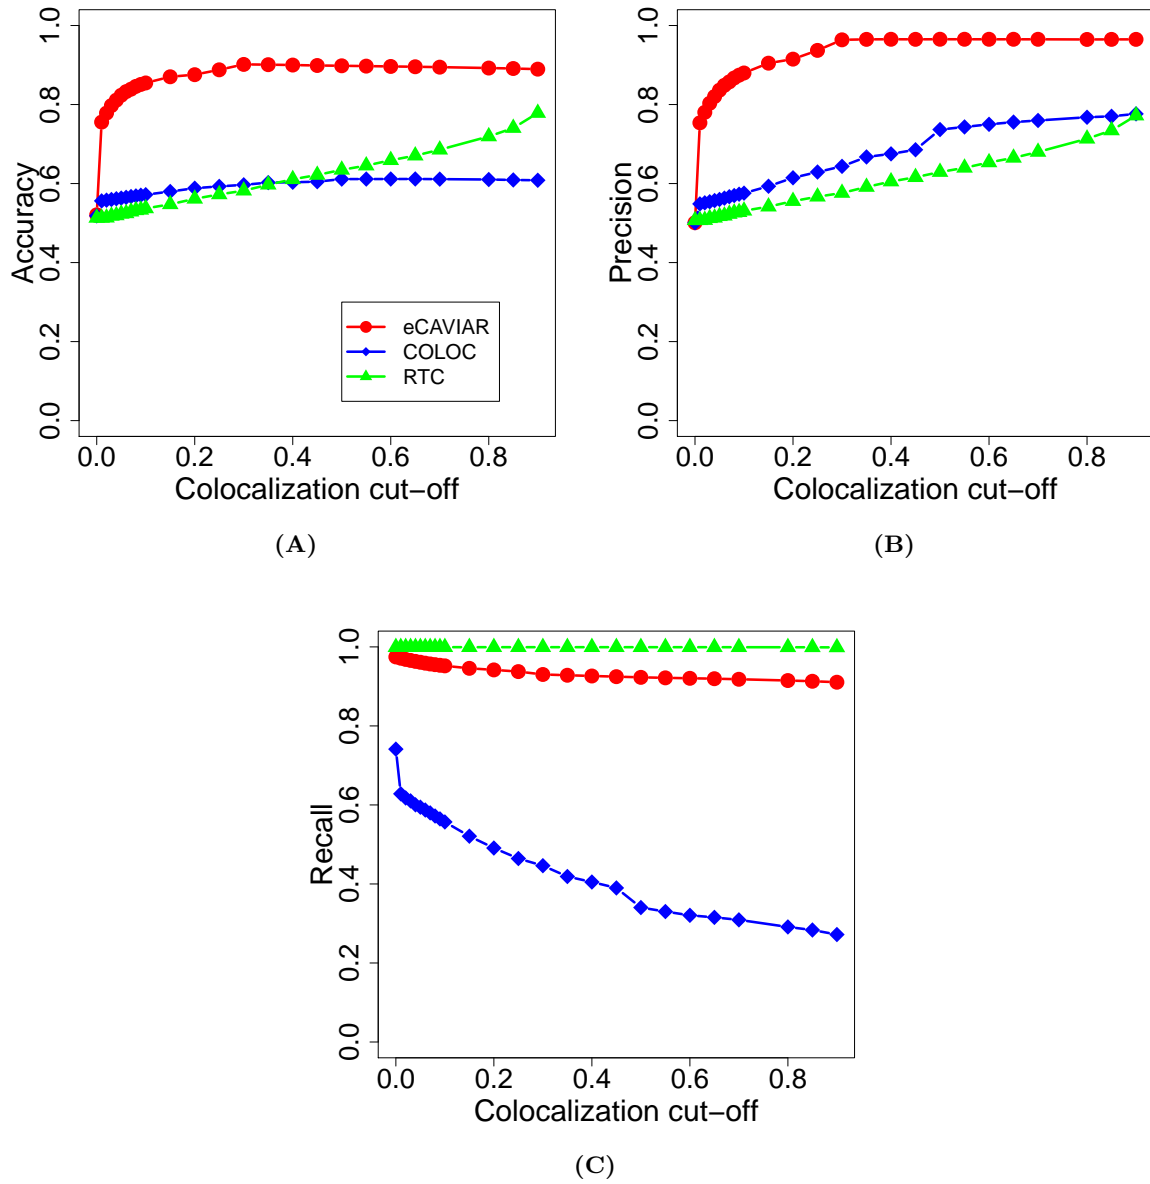

**Figure S7.** eCAVIAR is more accurate than existing methods in presence of allelic heterogeneity. We use similar process to generate the datasets as shown in Figure 4. However, in this case, we implant two causal variants. We set the non-colocalization cut-off threshold to 0.01%. RTC has better recall rare compared to eCAVIAR and COLOC.



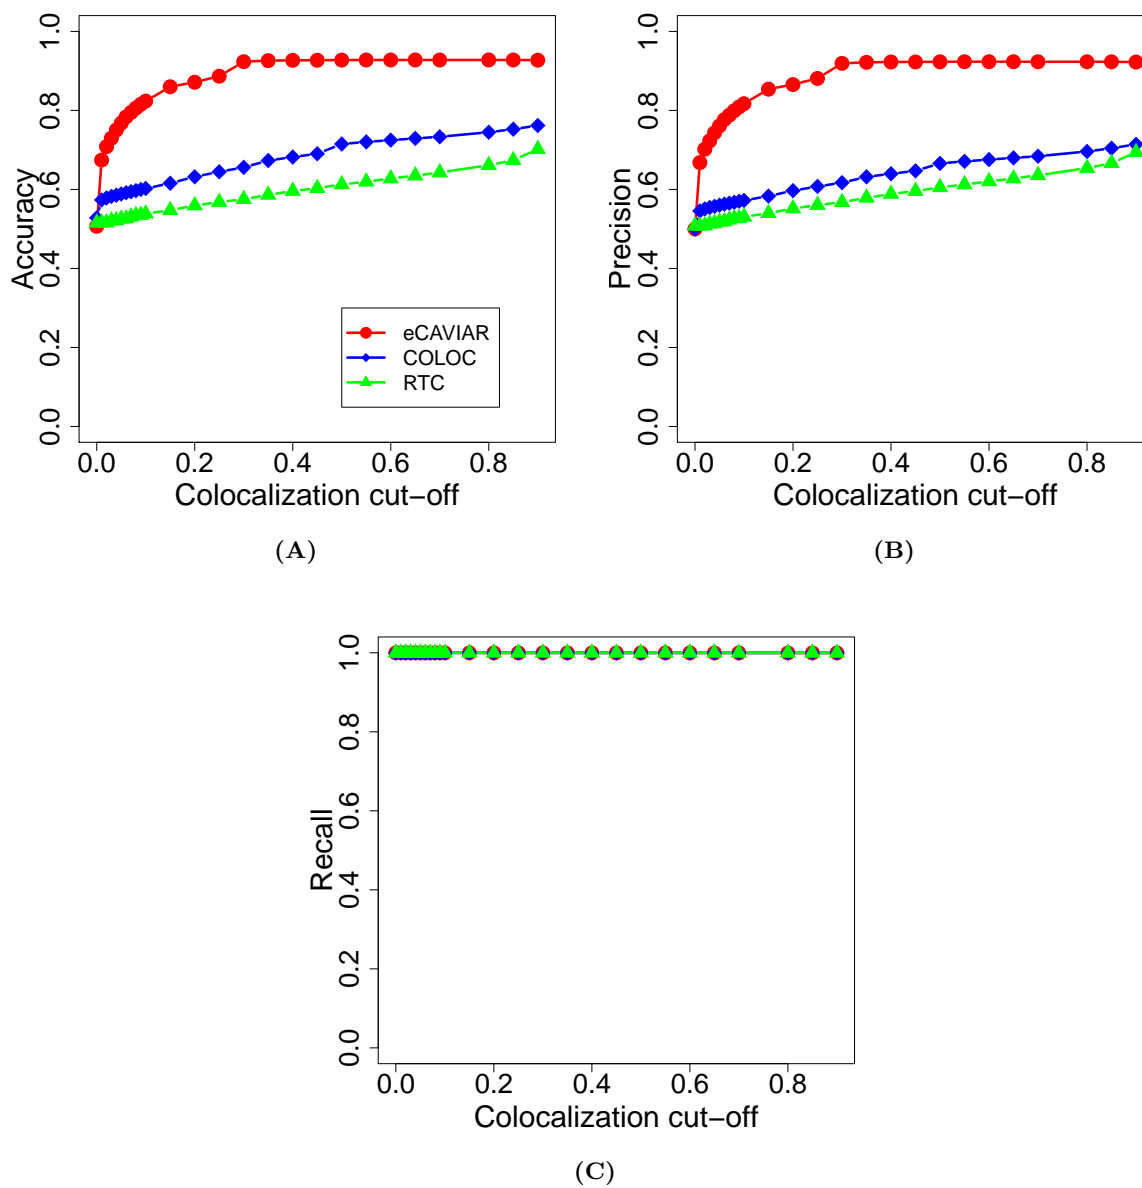

**Figure S8.** eCAVIAR outperforms existing methods when the causal variants are enriched with functional annotations. We implant one causal variant in our experiment.

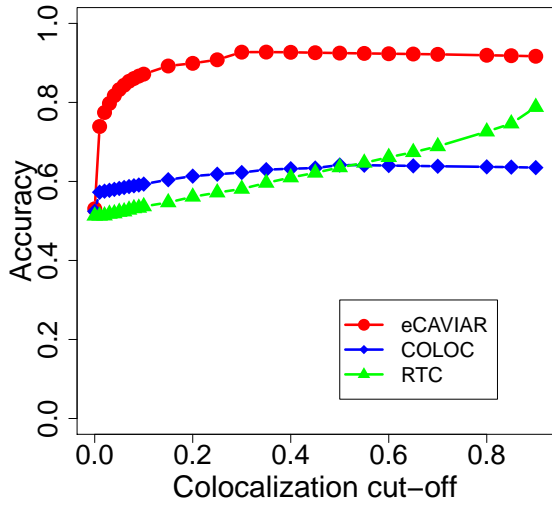

(A)

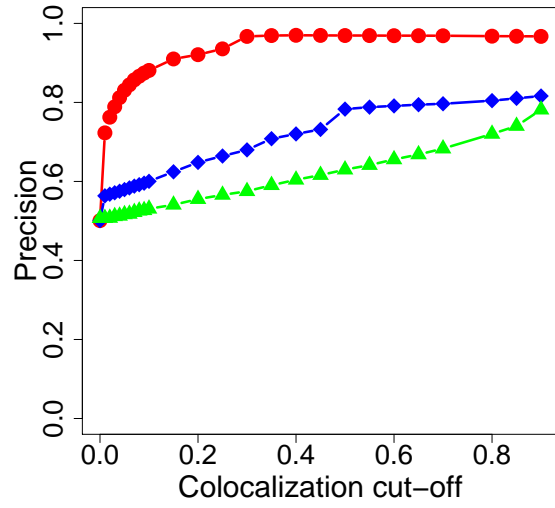

(B)

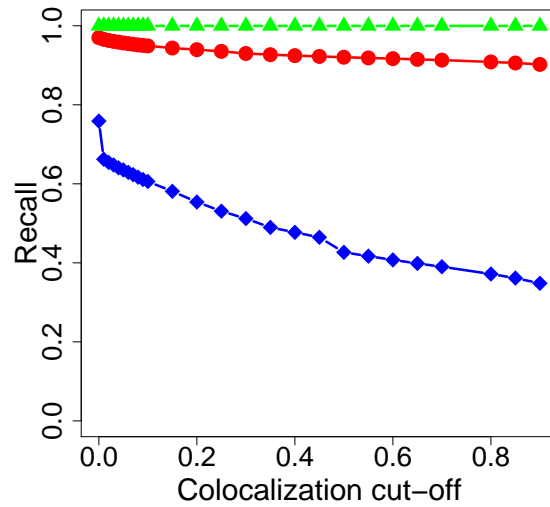

(C)

**Figure S9.** eCAVIAR outperforms existing methods when the causal variants are enriched with functional annotations. We implant two causal variants in our experiment.

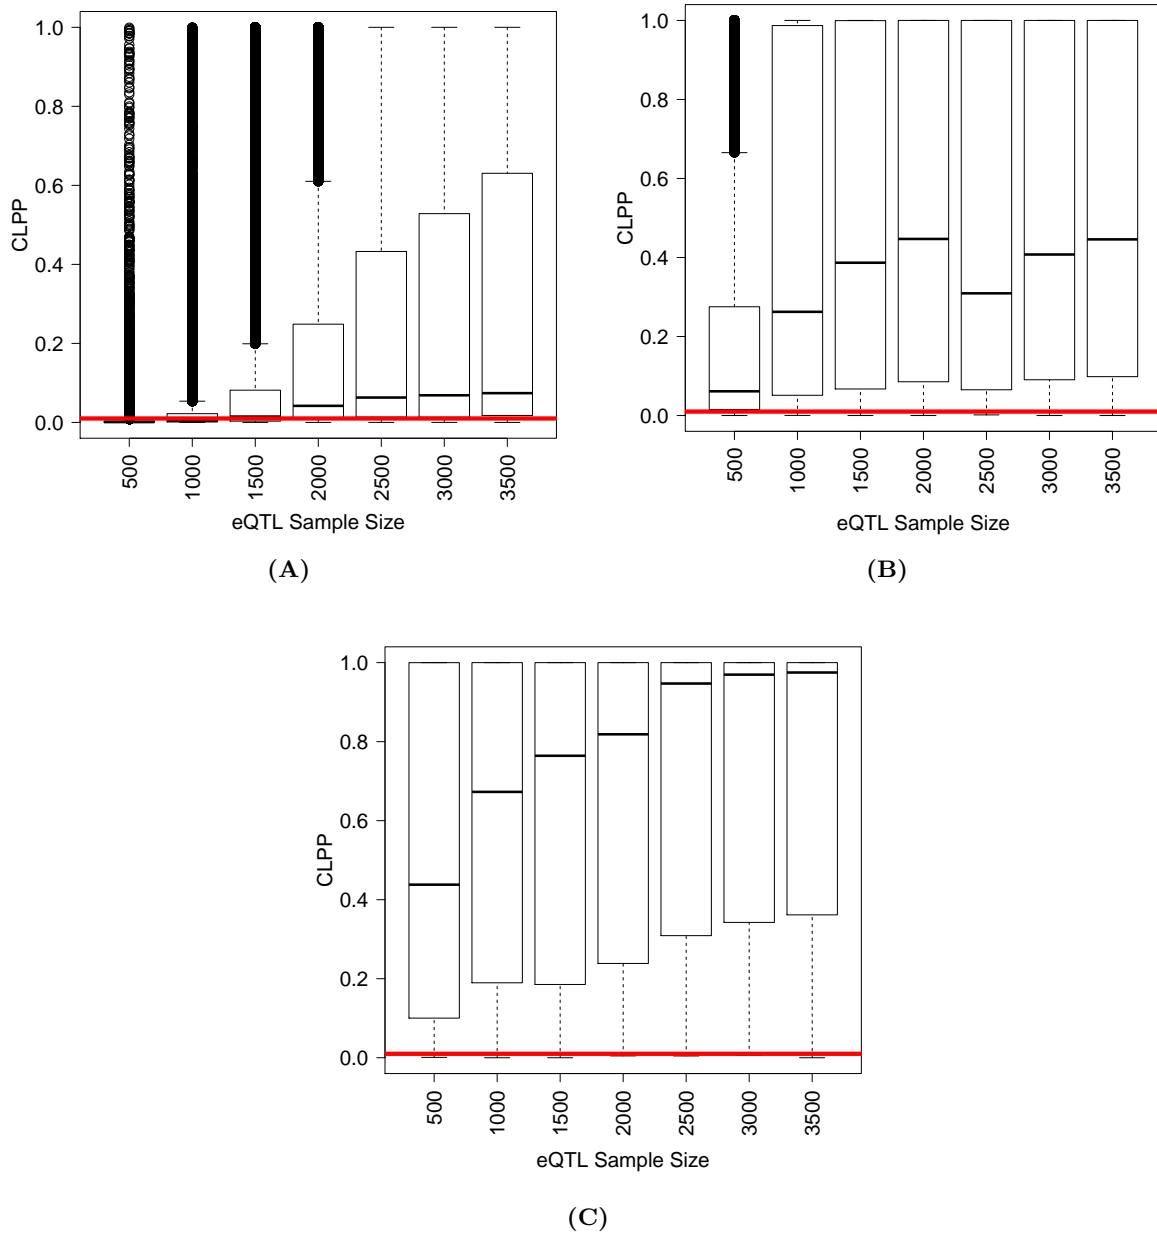

**Figure S10.** Effect of eQTL sample size on CLPP. The x-axis is the sample size that we vary from 500 to 3500. The y-axis is the distribution of CLPP. The red horizontal line indicates the 0.01 (1%) colocalization cut-off that is used our experiments. We set the sample size for GWAS to 5000. We simulate the effect size for colocalized variant such that it accounts for 0.01, 0.04, and 0.1 portion of the heritability as shown in panel (A), panel (B), and panel (C), respectively.

| Tissue                                | Number of Individuals |
|---------------------------------------|-----------------------|
| Uterus                                | 70                    |
| Brain Anterior cingulate cortex BA24  | 72                    |
| Small Intestine Terminal Ileum        | 77                    |
| Vagina                                | 79                    |
| Brain Hippocampus                     | 81                    |
| Brain Hypothalamus                    | 81                    |
| Brain Putamen basal ganglia           | 82                    |
| Ovary                                 | 85                    |
| Pituitary                             | 87                    |
| Prostate                              | 87                    |
| Brain Cerebellar Hemisphere           | 89                    |
| Spleen                                | 89                    |
| Brain Frontal Cortex BA9              | 92                    |
| Brain Nucleus accumbens basal ganglia | 93                    |
| Brain Cortex                          | 96                    |
| Liver                                 | 97                    |
| Brain Caudate basal ganglia           | 100                   |
| Brain Cerebellum                      | 103                   |
| Cells EBV-transformed lymphocytes     | 114                   |
| Artery Coronary                       | 118                   |
| Colon Sigmoid                         | 124                   |
| Adrenal Gland                         | 126                   |
| Esophagus Gastroesophageal Junction   | 127                   |
| Pancreas                              | 149                   |
| Testis                                | 157                   |
| Heart Atrial Appendage                | 159                   |
| Colon Transverse                      | 169                   |
| Stomach                               | 170                   |
| Breast Mammary Tissue                 | 183                   |
| Adipose Visceral Omentum              | 185                   |
| Heart Left Ventricle                  | 190                   |
| Skin Not Sun Exposed Suprapubic       | 196                   |
| Artery Aorta                          | 197                   |
| Esophagus Muscularis                  | 218                   |
| Esophagus Mucosa                      | 241                   |
| Nerve Tibial                          | 256                   |
| Cells Transformed fibroblasts         | 272                   |
| Lung                                  | 278                   |
| Thyroid                               | 278                   |
| Artery Tibial                         | 285                   |
| Adipose Subcutaneous                  | 298                   |
| Skin Sun Exposed Lower leg            | 302                   |
| Whole Blood                           | 338                   |
| Muscle Skeletal                       | 361                   |

**Table S1.** List of 44 tissues which are obtained from GTEx dataset. We provide the number of individuals genotyped for each tissue. Different tissues have different number of individuals.

**Table S2.** Potential colocalization loci for FG phenotype. Colocalization loci consists of two summary statistics. One summary statistics obtained FG GWAS and the other summary statistics obtained for one of the genes in GTEx. Thus, we obtained these potential colocalization loci by considering the variants which are reported significant in previous study [?] for FG phenotype in MAGIC dataset. For each significant variant, we consider 50 variants upstream and downstream of the significant variants to define a locus. Next, we consider genes for all the tissues in GTEx data where at least one of the variants in the locus are significantly associated (corrected multiple hypothesis p-value of  $10^{-5}$  or more significant) with its gene expression. We consider all the 44 tissues in GTEx to obtain the list of genes for each significant GWAS SNP.

| rsID       | Ensembl ID      | Gene Name            | Tissue                                | eQTL p-values     |
|------------|-----------------|----------------------|---------------------------------------|-------------------|
| rs10830963 | ENSG00000166002 | <i>SMCO4</i>         | Skin-Sun-Exposed-Lower-leg            | 2.44786305915e-05 |
| rs10830963 | ENSG00000166012 | <i>TAF1D</i>         | Brain-Nucleus-accumbens-basal-ganglia | 1.7539865514e-05  |
| rs10830963 | ENSG00000180773 | <i>SLC36A4</i>       | Esophagus-Mucosa                      | 5.2352746432e-05  |
| rs10830963 | ENSG00000182919 | <i>C11orf54</i>      | Thyroid                               | 8.61845523561e-06 |
| rs10830963 | ENSG00000206799 | <i>SNORA32</i>       | Skin-Sun-Exposed-Lower-leg            | 5.82640723736e-05 |
| rs10830963 | ENSG00000207145 | <i>SNORA18</i>       | Testis                                | 4.2352972541e-05  |
| rs10830963 | ENSG00000255445 | <i>RP11-573M3.3</i>  | Heart-Atrial-Appendage                | 9.56125858181e-05 |
| rs10885122 | ENSG00000150594 | <i>ADRA2A</i>        | Brain-Nucleus-accumbens-basal-ganglia | 2.57239942187e-10 |
| rs10885122 | ENSG00000150594 | <i>ADRA2A</i>        | Skin-Sun-Exposed-Lower-leg            | 8.13034309554e-05 |
| rs10885122 | ENSG00000203867 | <i>RBM20</i>         | Vagina                                | 0.000126958323984 |
| rs11071657 | ENSG00000103642 | <i>LACTB</i>         | Whole-Blood                           | 3.89333022107e-05 |
| rs11071657 | ENSG00000166104 | <i>RP11-299H2.3</i>  | Colon-Transverse                      | 8.83954284179e-05 |
| rs11071657 | ENSG00000259498 | <i>RP11-244F12.3</i> | Muscle-Skeletal                       | 3.86262074991e-05 |
| rs11071657 | ENSG00000259627 | <i>RP11-244F12.2</i> | Small-Intestine-Terminal-Ileum        | 2.27885479484e-05 |
| rs11071657 | ENSG00000259675 | <i>RP11-507B12.1</i> | Vagina                                | 6.91621612205e-05 |
| rs11558471 | ENSG00000147677 | <i>EIF3H</i>         | Spleen                                | 3.9259893852e-05  |
| rs11558471 | ENSG00000164756 | <i>SLC30A8</i>       | Testis                                | 2.05616636527e-05 |
| rs11558471 | ENSG00000205002 | <i>AARD</i>          | Uterus                                | 2.36883921342e-05 |
| rs11605924 | ENSG00000121653 | <i>MAPK8IP1</i>      | Cells-EBV-transformed-lymphocytes     | 7.4647373768e-06  |
| rs11605924 | ENSG00000121653 | <i>MAPK8IP1</i>      | Lung                                  | 7.67362712574e-07 |
| rs11605924 | ENSG00000121653 | <i>MAPK8IP1</i>      | Skin-Not-Sun-Exposed-Suprapubic       | 5.74803471957e-22 |
| rs11605924 | ENSG00000121653 | <i>MAPK8IP1</i>      | Skin-Sun-Exposed-Lower-leg            | 4.60639977153e-17 |
| rs11605924 | ENSG00000121653 | <i>MAPK8IP1</i>      | Spleen                                | 3.55628090171e-06 |
| rs11605924 | ENSG00000121653 | <i>MAPK8IP1</i>      | Whole-Blood                           | 7.82629295485e-21 |
| rs11605924 | ENSG00000121671 | <i>CRY2</i>          | Testis                                | 6.38769471885e-06 |
| rs11605924 | ENSG00000121671 | <i>CRY2</i>          | Whole-Blood                           | 1.03433652463e-05 |
| rs11605924 | ENSG00000157613 | <i>CREB3L1</i>       | Adipose-Subcutaneous                  | 0.000119111609495 |
| rs11605924 | ENSG00000165905 | <i>GYLTL1B</i>       | Heart-Atrial-Appendage                | 2.25819961703e-05 |
| rs11605924 | ENSG00000165905 | <i>GYLTL1B</i>       | Liver                                 | 1.24164721955e-05 |

|            |                 |                      |                                       |                   |
|------------|-----------------|----------------------|---------------------------------------|-------------------|
| rs11605924 | ENSG00000175220 | <i>ARHGAP1</i>       | Uterus                                | 1.90164370129e-05 |
| rs11605924 | ENSG00000175264 | <i>CHST1</i>         | Artery-Aorta                          | 8.34252658299e-08 |
| rs11605924 | ENSG00000175264 | <i>CHST1</i>         | Thyroid                               | 1.73199564995e-06 |
| rs11605924 | ENSG00000175274 | <i>TP53I11</i>       | Skin-Sun-Exposed-Lower-leg            | 0.000122950946627 |
| rs11605924 | ENSG00000180210 | <i>F2</i>            | Vagina                                | 2.48171640639e-05 |
| rs11605924 | ENSG00000181830 | <i>SLC35C1</i>       | Artery-Tibial                         | 2.34352827038e-06 |
| rs11605924 | ENSG00000181830 | <i>SLC35C1</i>       | Cells-Transformed-fibroblasts         | 6.250451226e-05   |
| rs11605924 | ENSG00000181830 | <i>SLC35C1</i>       | Esophagus-Mucosa                      | 6.20248570017e-14 |
| rs11605924 | ENSG00000181830 | <i>SLC35C1</i>       | Heart-Left-Ventricle                  | 7.89769212566e-05 |
| rs11605924 | ENSG00000181830 | <i>SLC35C1</i>       | Liver                                 | 2.18114395042e-06 |
| rs11605924 | ENSG00000181830 | <i>SLC35C1</i>       | Lung                                  | 3.26105205064e-05 |
| rs11605924 | ENSG00000181830 | <i>SLC35C1</i>       | Nerve-Tibial                          | 2.348334931e-05   |
| rs11605924 | ENSG00000181830 | <i>SLC35C1</i>       | Whole-Blood                           | 1.21176230508e-05 |
| rs11605924 | ENSG00000205106 | <i>DKFZp779M0652</i> | Adipose-Subcutaneous                  | 1.62392005396e-06 |
| rs11605924 | ENSG00000205106 | <i>DKFZp779M0652</i> | Artery-Aorta                          | 1.73680733946e-05 |
| rs11605924 | ENSG00000205106 | <i>DKFZp779M0652</i> | Artery-Tibial                         | 4.09586542776e-06 |
| rs11605924 | ENSG00000205106 | <i>DKFZp779M0652</i> | Brain-Hippocampus                     | 9.98988593786e-06 |
| rs11605924 | ENSG00000205106 | <i>DKFZp779M0652</i> | Brain-Hypothalamus                    | 2.50756209116e-06 |
| rs11605924 | ENSG00000205106 | <i>DKFZp779M0652</i> | Brain-Nucleus-accumbens-basal-ganglia | 4.27086076108e-07 |
| rs11605924 | ENSG00000205106 | <i>DKFZp779M0652</i> | Brain-Putamen-basal-ganglia           | 4.81194257971e-06 |
| rs11605924 | ENSG00000205106 | <i>DKFZp779M0652</i> | Colon-Transverse                      | 3.77728053812e-05 |
| rs11605924 | ENSG00000205106 | <i>DKFZp779M0652</i> | Esophagus-Mucosa                      | 9.50866511829e-09 |
| rs11605924 | ENSG00000205106 | <i>DKFZp779M0652</i> | Esophagus-Muscularis                  | 1.02011808847e-08 |
| rs11605924 | ENSG00000205106 | <i>DKFZp779M0652</i> | Heart-Atrial-Appendage                | 1.03742684719e-05 |
| rs11605924 | ENSG00000205106 | <i>DKFZp779M0652</i> | Heart-Left-Ventricle                  | 1.3250774481e-08  |
| rs11605924 | ENSG00000205106 | <i>DKFZp779M0652</i> | Liver                                 | 5.52158343567e-10 |
| rs11605924 | ENSG00000205106 | <i>DKFZp779M0652</i> | Lung                                  | 1.30661604158e-08 |
| rs11605924 | ENSG00000205106 | <i>DKFZp779M0652</i> | Nerve-Tibial                          | 2.5524407916e-06  |
| rs11605924 | ENSG00000205106 | <i>DKFZp779M0652</i> | Testis                                | 1.65428551625e-10 |
| rs11605924 | ENSG00000205106 | <i>DKFZp779M0652</i> | Thyroid                               | 6.71470968327e-09 |
| rs11605924 | ENSG00000254427 | <i>RP11-430H10.1</i> | Adipose-Visceral-Omentum              | 8.54818728207e-05 |
| rs11605924 | ENSG00000255091 | <i>RP11-495O11.1</i> | Artery-Aorta                          | 1.87736272121e-06 |
| rs11605924 | ENSG00000255091 | <i>RP11-495O11.1</i> | Thyroid                               | 3.08189576647e-05 |
| rs11605924 | ENSG00000255447 | <i>CTD-2210P24.6</i> | Testis                                | 3.8986007455e-07  |
| rs11605924 | ENSG00000255498 | <i>RP11-618K13.2</i> | Skin-Not-Sun-Exposed-Suprapubic       | 4.70164342541e-07 |
| rs11605924 | ENSG00000255498 | <i>RP11-618K13.2</i> | Skin-Sun-Exposed-Lower-leg            | 3.42801905208e-06 |

|            |                 |                      |                                     |                   |
|------------|-----------------|----------------------|-------------------------------------|-------------------|
| rs11605924 | ENSG00000255498 | <i>RP11-618K13.2</i> | Whole-Blood                         | 4.42514908343e-07 |
| rs11717195 | ENSG00000065485 | <i>PDIA5</i>         | Artery-Tibial                       | 5.02513492893e-07 |
| rs11717195 | ENSG00000065485 | <i>PDIA5</i>         | Thyroid                             | 0.000126169254671 |
| rs11717195 | ENSG00000121542 | <i>SEC22A</i>        | Adipose-Subcutaneous                | 4.48128076072e-30 |
| rs11717195 | ENSG00000121542 | <i>SEC22A</i>        | Adipose-Visceral-Omentum            | 1.2210488429e-15  |
| rs11717195 | ENSG00000121542 | <i>SEC22A</i>        | Artery-Aorta                        | 2.74502248777e-22 |
| rs11717195 | ENSG00000121542 | <i>SEC22A</i>        | Artery-Coronary                     | 1.74364778894e-07 |
| rs11717195 | ENSG00000121542 | <i>SEC22A</i>        | Artery-Tibial                       | 2.92641608999e-41 |
| rs11717195 | ENSG00000121542 | <i>SEC22A</i>        | Brain-Hippocampus                   | 4.24221472915e-05 |
| rs11717195 | ENSG00000121542 | <i>SEC22A</i>        | Brain-Putamen-basal-ganglia         | 1.58717438504e-06 |
| rs11717195 | ENSG00000121542 | <i>SEC22A</i>        | Breast-Mammary-Tissue               | 8.14091243757e-26 |
| rs11717195 | ENSG00000121542 | <i>SEC22A</i>        | Cells-EBV-transformed-lymphocytes   | 3.97453071673e-19 |
| rs11717195 | ENSG00000121542 | <i>SEC22A</i>        | Cells-Transformed-fibroblasts       | 1.72043210473e-21 |
| rs11717195 | ENSG00000121542 | <i>SEC22A</i>        | Colon-Sigmoid                       | 3.32176009411e-05 |
| rs11717195 | ENSG00000121542 | <i>SEC22A</i>        | Colon-Transverse                    | 1.32320584448e-16 |
| rs11717195 | ENSG00000121542 | <i>SEC22A</i>        | Esophagus-Gastroesophageal-Junction | 6.23486130719e-08 |
| rs11717195 | ENSG00000121542 | <i>SEC22A</i>        | Esophagus-Mucosa                    | 1.57111454052e-32 |
| rs11717195 | ENSG00000121542 | <i>SEC22A</i>        | Esophagus-Muscularis                | 3.02922278608e-18 |
| rs11717195 | ENSG00000121542 | <i>SEC22A</i>        | Heart-Atrial-Appendage              | 1.75855920111e-10 |
| rs11717195 | ENSG00000121542 | <i>SEC22A</i>        | Heart-Left-Ventricle                | 8.28685652528e-16 |
| rs11717195 | ENSG00000121542 | <i>SEC22A</i>        | Liver                               | 4.55618336936e-05 |
| rs11717195 | ENSG00000121542 | <i>SEC22A</i>        | Lung                                | 1.93513734862e-32 |
| rs11717195 | ENSG00000121542 | <i>SEC22A</i>        | Muscle-Skeletal                     | 5.74835973093e-12 |
| rs11717195 | ENSG00000121542 | <i>SEC22A</i>        | Nerve-Tibial                        | 8.64817990778e-31 |
| rs11717195 | ENSG00000121542 | <i>SEC22A</i>        | Ovary                               | 7.13294372886e-08 |
| rs11717195 | ENSG00000121542 | <i>SEC22A</i>        | Pancreas                            | 4.95208254925e-17 |
| rs11717195 | ENSG00000121542 | <i>SEC22A</i>        | Pituitary                           | 2.83455224563e-06 |
| rs11717195 | ENSG00000121542 | <i>SEC22A</i>        | Prostate                            | 3.8871388354e-10  |
| rs11717195 | ENSG00000121542 | <i>SEC22A</i>        | Skin-Not-Sun-Exposed-Suprapubic     | 2.78022705583e-24 |
| rs11717195 | ENSG00000121542 | <i>SEC22A</i>        | Skin-Sun-Exposed-Lower-leg          | 7.15947070871e-30 |
| rs11717195 | ENSG00000121542 | <i>SEC22A</i>        | Small-Intestine-Terminal-Ileum      | 9.43650095252e-05 |
| rs11717195 | ENSG00000121542 | <i>SEC22A</i>        | Spleen                              | 3.35596740581e-12 |
| rs11717195 | ENSG00000121542 | <i>SEC22A</i>        | Stomach                             | 4.71966998706e-09 |
| rs11717195 | ENSG00000121542 | <i>SEC22A</i>        | Testis                              | 1.50510717516e-29 |
| rs11717195 | ENSG00000121542 | <i>SEC22A</i>        | Thyroid                             | 2.90016216577e-26 |
| rs11717195 | ENSG00000121542 | <i>SEC22A</i>        | Uterus                              | 2.5995012953e-05  |

|            |                 |                      |                                     |                   |
|------------|-----------------|----------------------|-------------------------------------|-------------------|
| rs11717195 | ENSG00000121542 | <i>SEC22A</i>        | Vagina                              | 4.99348818084e-07 |
| rs11717195 | ENSG00000121542 | <i>SEC22A</i>        | Whole-Blood                         | 1.01152955781e-08 |
| rs11717195 | ENSG00000138463 | <i>DIRC2</i>         | Vagina                              | 4.522896308e-05   |
| rs11717195 | ENSG00000173175 | <i>ADCY5</i>         | Artery-Tibial                       | 5.28198909019e-08 |
| rs11717195 | ENSG00000173175 | <i>ADCY5</i>         | Colon-Sigmoid                       | 2.41887725148e-05 |
| rs11717195 | ENSG00000173175 | <i>ADCY5</i>         | Colon-Transverse                    | 9.36426114519e-05 |
| rs11717195 | ENSG00000173175 | <i>ADCY5</i>         | Esophagus-Mucosa                    | 2.73445293874e-05 |
| rs11717195 | ENSG00000173175 | <i>ADCY5</i>         | Esophagus-Muscularis                | 5.1190584425e-05  |
| rs11717195 | ENSG00000173175 | <i>ADCY5</i>         | Heart-Atrial-Appendage              | 5.26218774438e-08 |
| rs11717195 | ENSG00000173175 | <i>ADCY5</i>         | Heart-Left-Ventricle                | 1.9434499794e-06  |
| rs11717195 | ENSG00000173175 | <i>ADCY5</i>         | Lung                                | 2.25598951136e-07 |
| rs11717195 | ENSG00000173175 | <i>ADCY5</i>         | Muscle-Skeletal                     | 3.33007896392e-05 |
| rs11717195 | ENSG00000173175 | <i>ADCY5</i>         | Thyroid                             | 2.52528123532e-05 |
| rs11717195 | ENSG00000173175 | <i>ADCY5</i>         | Uterus                              | 9.56899015449e-06 |
| rs11717195 | ENSG00000272678 | <i>RP11-797D24.4</i> | Artery-Tibial                       | 2.88661745263e-07 |
| rs11717195 | ENSG00000272678 | <i>RP11-797D24.4</i> | Esophagus-Mucosa                    | 3.53458374031e-06 |
| rs11717195 | ENSG00000272678 | <i>RP11-797D24.4</i> | Heart-Atrial-Appendage              | 1.03080946347e-05 |
| rs11717195 | ENSG00000272678 | <i>RP11-797D24.4</i> | Heart-Left-Ventricle                | 4.61842170723e-08 |
| rs11717195 | ENSG00000272678 | <i>RP11-797D24.4</i> | Lung                                | 2.87399425739e-06 |
| rs11920090 | ENSG00000136603 | <i>SKIL</i>          | Ovary                               | 2.52936436418e-05 |
| rs11920090 | ENSG00000154310 | <i>TNIK</i>          | Pituitary                           | 6.90410977459e-05 |
| rs11920090 | ENSG00000163558 | <i>PRKCI</i>         | Skin-Sun-Exposed-Lower-leg          | 7.85139178977e-05 |
| rs11920090 | ENSG00000163577 | <i>EIF5A2</i>        | Cells-Transformed-fibroblasts       | 3.45312321942e-05 |
| rs11920090 | ENSG00000163584 | <i>RPL22L1</i>       | Whole-Blood                         | 5.01595457402e-12 |
| rs11920090 | ENSG00000173890 | <i>GPR160</i>        | Esophagus-Gastroesophageal-Junction | 5.08237136088e-05 |
| rs11920090 | ENSG00000242583 | <i>RP11-379K17.9</i> | Testis                              | 5.91788385319e-07 |
| rs174550   | ENSG00000006118 | <i>TMEM132A</i>      | Ovary                               | 5.65591312284e-05 |
| rs174550   | ENSG00000110446 | <i>SLC15A3</i>       | Pituitary                           | 6.79469593425e-05 |
| rs174550   | ENSG00000124915 | <i>DKFZP434K028</i>  | Liver                               | 1.52224793122e-15 |
| rs174550   | ENSG00000124920 | <i>MYRF</i>          | Adipose-Subcutaneous                | 1.07163887489e-06 |
| rs174550   | ENSG00000124920 | <i>MYRF</i>          | Artery-Tibial                       | 1.81465783637e-06 |
| rs174550   | ENSG00000124920 | <i>MYRF</i>          | Cells-Transformed-fibroblasts       | 2.05605381138e-10 |
| rs174550   | ENSG00000124920 | <i>MYRF</i>          | Colon-Transverse                    | 6.27262101649e-08 |
| rs174550   | ENSG00000124920 | <i>MYRF</i>          | Liver                               | 4.50726642799e-24 |
| rs174550   | ENSG00000124920 | <i>MYRF</i>          | Pancreas                            | 1.32784077095e-05 |
| rs174550   | ENSG00000124920 | <i>MYRF</i>          | Whole-Blood                         | 7.66855740345e-20 |



|          |                 |                |                                     |                    |
|----------|-----------------|----------------|-------------------------------------|--------------------|
| rs174550 | ENSG00000124942 | <i>AHNAK</i>   | Nerve-Tibial                        | 6.84199477452e-05  |
| rs174550 | ENSG00000134780 | <i>DAGLA</i>   | Cells-Transformed-fibroblasts       | 4.14413546326e-05  |
| rs174550 | ENSG00000134780 | <i>DAGLA</i>   | Nerve-Tibial                        | 2.13192293716e-06  |
| rs174550 | ENSG00000134780 | <i>DAGLA</i>   | Pancreas                            | 8.3610269796e-06   |
| rs174550 | ENSG00000134824 | <i>FADS2</i>   | Adipose-Subcutaneous                | 1.47626352099e-06  |
| rs174550 | ENSG00000134824 | <i>FADS2</i>   | Adipose-Visceral-Omentum            | 2.86468845017e-06  |
| rs174550 | ENSG00000134824 | <i>FADS2</i>   | Artery-Aorta                        | 3.47197673622e-11  |
| rs174550 | ENSG00000134824 | <i>FADS2</i>   | Artery-Tibial                       | 8.53787978639e-08  |
| rs174550 | ENSG00000134824 | <i>FADS2</i>   | Breast-Mammary-Tissue               | 1.18893114978e-08  |
| rs174550 | ENSG00000134824 | <i>FADS2</i>   | Cells-EBV-transformed-lymphocytes   | 6.92791393224e-05  |
| rs174550 | ENSG00000134824 | <i>FADS2</i>   | Cells-Transformed-fibroblasts       | 4.37278719299e-38  |
| rs174550 | ENSG00000134824 | <i>FADS2</i>   | Colon-Sigmoid                       | 5.75779994918e-09  |
| rs174550 | ENSG00000134824 | <i>FADS2</i>   | Colon-Transverse                    | 3.87706737558e-23  |
| rs174550 | ENSG00000134824 | <i>FADS2</i>   | Esophagus-Gastroesophageal-Junction | 1.25995286312e-10  |
| rs174550 | ENSG00000134824 | <i>FADS2</i>   | Esophagus-Muscularis                | 7.55772902317e-28  |
| rs174550 | ENSG00000134824 | <i>FADS2</i>   | Heart-Atrial-Appendage              | 1.26182123746e-08  |
| rs174550 | ENSG00000134824 | <i>FADS2</i>   | Lung                                | 1.03018055989e-07  |
| rs174550 | ENSG00000134824 | <i>FADS2</i>   | Muscle-Skeletal                     | 2.66948968982e-09  |
| rs174550 | ENSG00000134824 | <i>FADS2</i>   | Nerve-Tibial                        | 4.08649453855e-16  |
| rs174550 | ENSG00000134824 | <i>FADS2</i>   | Pancreas                            | 5.62568232448e-06  |
| rs174550 | ENSG00000134824 | <i>FADS2</i>   | Skin-Not-Sun-Exposed-Suprapubic     | 9.06036111248e-05  |
| rs174550 | ENSG00000134824 | <i>FADS2</i>   | Spleen                              | 4.47894470381e-26  |
| rs174550 | ENSG00000134824 | <i>FADS2</i>   | Stomach                             | 4.50207540976e-06  |
| rs174550 | ENSG00000134824 | <i>FADS2</i>   | Thyroid                             | 2.18577113233e-23  |
| rs174550 | ENSG00000134824 | <i>FADS2</i>   | Whole-Blood                         | 1.23516042549e-124 |
| rs174550 | ENSG00000134825 | <i>TMEM258</i> | Adipose-Subcutaneous                | 4.06417386895e-06  |
| rs174550 | ENSG00000134825 | <i>TMEM258</i> | Adipose-Visceral-Omentum            | 6.05997896336e-05  |
| rs174550 | ENSG00000134825 | <i>TMEM258</i> | Artery-Tibial                       | 4.30808695008e-07  |
| rs174550 | ENSG00000134825 | <i>TMEM258</i> | Cells-EBV-transformed-lymphocytes   | 7.99556999059e-06  |
| rs174550 | ENSG00000134825 | <i>TMEM258</i> | Cells-Transformed-fibroblasts       | 1.69327446094e-07  |
| rs174550 | ENSG00000134825 | <i>TMEM258</i> | Colon-Transverse                    | 1.3186362034e-05   |
| rs174550 | ENSG00000134825 | <i>TMEM258</i> | Muscle-Skeletal                     | 1.20748545687e-05  |
| rs174550 | ENSG00000134825 | <i>TMEM258</i> | Nerve-Tibial                        | 1.36798969082e-06  |
| rs174550 | ENSG00000134825 | <i>TMEM258</i> | Ovary                               | 9.92380755701e-05  |
| rs174550 | ENSG00000134825 | <i>TMEM258</i> | Skin-Sun-Exposed-Lower-leg          | 3.3614144123e-08   |
| rs174550 | ENSG00000134825 | <i>TMEM258</i> | Whole-Blood                         | 1.31063979536e-07  |

|           |                 |                      |                                       |                   |
|-----------|-----------------|----------------------|---------------------------------------|-------------------|
| rs174550  | ENSG00000149480 | <i>MTA2</i>          | Liver                                 | 0.000112499358457 |
| rs174550  | ENSG00000149485 | <i>FADS1</i>         | Artery-Tibial                         | 9.4043631547e-06  |
| rs174550  | ENSG00000149485 | <i>FADS1</i>         | Brain-Hippocampus                     | 4.54093402282e-05 |
| rs174550  | ENSG00000149485 | <i>FADS1</i>         | Brain-Putamen-basal-ganglia           | 3.22433297405e-06 |
| rs174550  | ENSG00000149485 | <i>FADS1</i>         | Breast-Mammary-Tissue                 | 1.74825888583e-05 |
| rs174550  | ENSG00000149485 | <i>FADS1</i>         | Colon-Sigmoid                         | 1.33527941446e-05 |
| rs174550  | ENSG00000149485 | <i>FADS1</i>         | Liver                                 | 4.2645289605e-05  |
| rs174550  | ENSG00000149485 | <i>FADS1</i>         | Muscle-Skeletal                       | 4.29712744478e-09 |
| rs174550  | ENSG00000149485 | <i>FADS1</i>         | Nerve-Tibial                          | 9.86394789532e-13 |
| rs174550  | ENSG00000149485 | <i>FADS1</i>         | Pancreas                              | 3.71355853188e-25 |
| rs174550  | ENSG00000149485 | <i>FADS1</i>         | Stomach                               | 1.10846086182e-10 |
| rs174550  | ENSG00000149485 | <i>FADS1</i>         | Thyroid                               | 1.53366188198e-06 |
| rs174550  | ENSG00000149499 | <i>EML3</i>          | Skin-Not-Sun-Exposed-Suprapubic       | 7.6191865783e-05  |
| rs174550  | ENSG00000149506 | <i>ZP1</i>           | Adrenal-Gland                         | 0.0001224879412   |
| rs174550  | ENSG00000162144 | <i>CYB561A3</i>      | Artery-Aorta                          | 9.66918982602e-05 |
| rs174550  | ENSG00000162188 | <i>GNG3</i>          | Brain-Hippocampus                     | 7.14451224699e-05 |
| rs174550  | ENSG00000162191 | <i>UBXN1</i>         | Brain-Putamen-basal-ganglia           | 2.14731353455e-05 |
| rs174550  | ENSG00000167987 | <i>VPS37C</i>        | Lung                                  | 8.86220323909e-06 |
| rs174550  | ENSG00000167995 | <i>BEST1</i>         | Stomach                               | 6.31159912283e-05 |
| rs174550  | ENSG00000168000 | <i>BSCL2</i>         | Brain-Hypothalamus                    | 1.93266607273e-05 |
| rs174550  | ENSG00000168002 | <i>POLR2G</i>        | Artery-Aorta                          | 9.51846650203e-06 |
| rs174550  | ENSG00000207601 | <i>MIR611</i>        | Muscle-Skeletal                       | 9.25132337759e-06 |
| rs174550  | ENSG00000207601 | <i>MIR611</i>        | Thyroid                               | 9.42688703228e-05 |
| rs174550  | ENSG00000214753 | <i>HNRNPUL2</i>      | Colon-Transverse                      | 7.55875326174e-05 |
| rs174550  | ENSG00000221968 | <i>FADS3</i>         | Liver                                 | 4.59871741566e-06 |
| rs174550  | ENSG00000255118 | <i>RP11-703H8.7</i>  | Cells-Transformed-fibroblasts         | 5.40761628183e-05 |
| rs174550  | ENSG00000257052 | <i>RP11-881M11.2</i> | Skin-Sun-Exposed-Lower-leg            | 9.65492056964e-05 |
| rs2191349 | ENSG00000237070 | <i>LOC105375166</i>  | Colon-Transverse                      | 8.91670843795e-05 |
| rs4607517 | ENSG00000015676 | <i>NUDCD3</i>        | Colon-Sigmoid                         | 6.81574992936e-05 |
| rs4607517 | ENSG00000015676 | <i>NUDCD3</i>        | Colon-Transverse                      | 0.000132421812821 |
| rs4607517 | ENSG00000058404 | <i>CAMK2B</i>        | Nerve-Tibial                          | 1.02571474118e-06 |
| rs4607517 | ENSG00000106603 | <i>COA1</i>          | Muscle-Skeletal                       | 9.88236081708e-05 |
| rs4607517 | ENSG00000106603 | <i>COA1</i>          | Small-Intestine-Terminal-Ileum        | 7.43495145463e-05 |
| rs4607517 | ENSG00000106608 | <i>URGCP</i>         | Brain-Hippocampus                     | 0.000118741863422 |
| rs4607517 | ENSG00000106631 | <i>MYL7</i>          | Brain-Hypothalamus                    | 2.03579173114e-07 |
| rs4607517 | ENSG00000106631 | <i>MYL7</i>          | Brain-Nucleus-accumbens-basal-ganglia | 1.57407391493e-05 |

|           |                 |                     |                                     |                   |
|-----------|-----------------|---------------------|-------------------------------------|-------------------|
| rs4607517 | ENSG00000106633 | <i>GCK</i>          | Artery-Aorta                        | 3.64341185775e-08 |
| rs4607517 | ENSG00000106633 | <i>GCK</i>          | Artery-Tibial                       | 2.50853052784e-06 |
| rs4607517 | ENSG00000106633 | <i>GCK</i>          | Cells-Transformed-fibroblasts       | 2.59513829691e-06 |
| rs4607517 | ENSG00000106633 | <i>GCK</i>          | Colon-Sigmoid                       | 7.91281792765e-05 |
| rs4607517 | ENSG00000106633 | <i>GCK</i>          | Ovary                               | 2.74478432922e-05 |
| rs4607517 | ENSG00000106633 | <i>GCK</i>          | Thyroid                             | 1.40524002295e-06 |
| rs4607517 | ENSG00000106636 | <i>YKT6</i>         | Artery-Aorta                        | 4.64383379797e-05 |
| rs4607517 | ENSG00000106636 | <i>YKT6</i>         | Artery-Tibial                       | 1.35586346349e-05 |
| rs4607517 | ENSG00000106636 | <i>YKT6</i>         | Muscle-Skeletal                     | 1.3504504511e-06  |
| rs4607517 | ENSG00000106636 | <i>YKT6</i>         | Nerve-Tibial                        | 3.77204249383e-08 |
| rs4607517 | ENSG00000106636 | <i>YKT6</i>         | Spleen                              | 0.000110161962343 |
| rs4607517 | ENSG00000106636 | <i>YKT6</i>         | Testis                              | 2.80798077625e-08 |
| rs4607517 | ENSG00000122678 | <i>POLM</i>         | Pituitary                           | 0.000127963289669 |
| rs4607517 | ENSG00000214783 | <i>POLR2J4</i>      | Stomach                             | 5.57197202642e-05 |
| rs4607517 | ENSG00000232956 | <i>SNHG15</i>       | Spleen                              | 1.86473081598e-05 |
| rs4607517 | ENSG00000239775 | <i>AC017116.11</i>  | Artery-Tibial                       | 1.11222953027e-05 |
| rs4607517 | ENSG00000239775 | <i>AC017116.11</i>  | Pituitary                           | 8.06875463105e-05 |
| rs4607517 | ENSG00000239775 | <i>AC017116.11</i>  | Skin-Sun-Exposed-Lower-leg          | 2.66772000874e-05 |
| rs4607517 | ENSG00000272768 | <i>RP4-673M15.1</i> | Whole-Blood                         | 3.67370732112e-05 |
| rs560887  | ENSG00000144357 | <i>UBR3</i>         | Adipose-Subcutaneous                | 4.2131571751e-05  |
| rs560887  | ENSG00000152253 | <i>SPC25</i>        | Adipose-Subcutaneous                | 3.86223993369e-12 |
| rs560887  | ENSG00000152253 | <i>SPC25</i>        | Adipose-Visceral-Omentum            | 3.34610610317e-08 |
| rs560887  | ENSG00000152253 | <i>SPC25</i>        | Breast-Mammary-Tissue               | 1.94333203135e-09 |
| rs560887  | ENSG00000152253 | <i>SPC25</i>        | Esophagus-Gastroesophageal-Junction | 6.57684285001e-05 |
| rs560887  | ENSG00000152253 | <i>SPC25</i>        | Esophagus-Muscularis                | 2.72793402053e-05 |
| rs560887  | ENSG00000152253 | <i>SPC25</i>        | Heart-Left-Ventricle                | 2.45718348331e-07 |
| rs560887  | ENSG00000152253 | <i>SPC25</i>        | Lung                                | 1.32477367276e-10 |
| rs560887  | ENSG00000152253 | <i>SPC25</i>        | Nerve-Tibial                        | 1.41909731656e-07 |
| rs560887  | ENSG00000152253 | <i>SPC25</i>        | Pancreas                            | 6.27712479465e-14 |
| rs560887  | ENSG00000152253 | <i>SPC25</i>        | Stomach                             | 7.4687660235e-08  |
| rs560887  | ENSG00000152253 | <i>SPC25</i>        | Thyroid                             | 2.23167085387e-06 |
| rs560887  | ENSG00000152253 | <i>SPC25</i>        | Uterus                              | 8.63781093856e-05 |
| rs560887  | ENSG00000152254 | <i>G6PC2</i>        | Adipose-Subcutaneous                | 2.29365890692e-44 |
| rs560887  | ENSG00000152254 | <i>G6PC2</i>        | Adipose-Visceral-Omentum            | 9.90863520284e-40 |
| rs560887  | ENSG00000152254 | <i>G6PC2</i>        | Breast-Mammary-Tissue               | 3.98413880387e-62 |
| rs560887  | ENSG00000152254 | <i>G6PC2</i>        | Colon-Transverse                    | 3.06859548601e-09 |

|           |                 |                      |                                     |                   |
|-----------|-----------------|----------------------|-------------------------------------|-------------------|
| rs560887  | ENSG00000152254 | <i>G6PC2</i>         | Lung                                | 1.77754225575e-69 |
| rs560887  | ENSG00000152254 | <i>G6PC2</i>         | Nerve-Tibial                        | 9.62300344586e-30 |
| rs560887  | ENSG00000152254 | <i>G6PC2</i>         | Skin-Not-Sun-Exposed-Suprapubic     | 4.11488440163e-36 |
| rs560887  | ENSG00000152254 | <i>G6PC2</i>         | Skin-Sun-Exposed-Lower-leg          | 5.04823221975e-57 |
| rs560887  | ENSG00000152254 | <i>G6PC2</i>         | Stomach                             | 5.70440304756e-21 |
| rs560887  | ENSG00000152254 | <i>G6PC2</i>         | Thyroid                             | 1.60317874106e-34 |
| rs560887  | ENSG00000163072 | <i>NOSTRIN</i>       | Adipose-Subcutaneous                | 8.99742781521e-08 |
| rs560887  | ENSG00000163072 | <i>NOSTRIN</i>       | Adrenal-Gland                       | 7.36729049722e-07 |
| rs560887  | ENSG00000163072 | <i>NOSTRIN</i>       | Artery-Tibial                       | 3.92609755042e-06 |
| rs560887  | ENSG00000163072 | <i>NOSTRIN</i>       | Cells-EBV-transformed-lymphocytes   | 5.43395002041e-26 |
| rs560887  | ENSG00000163072 | <i>NOSTRIN</i>       | Colon-Transverse                    | 3.26106663575e-06 |
| rs560887  | ENSG00000163072 | <i>NOSTRIN</i>       | Heart-Left-Ventricle                | 1.32053075953e-08 |
| rs560887  | ENSG00000163072 | <i>NOSTRIN</i>       | Lung                                | 5.92637609704e-08 |
| rs560887  | ENSG00000163072 | <i>NOSTRIN</i>       | Nerve-Tibial                        | 2.17221822661e-13 |
| rs560887  | ENSG00000163072 | <i>NOSTRIN</i>       | Pancreas                            | 2.1316196208e-10  |
| rs560887  | ENSG00000163072 | <i>NOSTRIN</i>       | Prostate                            | 1.59244224983e-06 |
| rs560887  | ENSG00000163072 | <i>NOSTRIN</i>       | Skin-Sun-Exposed-Lower-leg          | 7.2171093318e-09  |
| rs560887  | ENSG00000163072 | <i>NOSTRIN</i>       | Stomach                             | 1.6447331884e-17  |
| rs560887  | ENSG00000163072 | <i>NOSTRIN</i>       | Testis                              | 2.41334475961e-16 |
| rs560887  | ENSG00000163072 | <i>NOSTRIN</i>       | Thyroid                             | 3.03601387041e-07 |
| rs560887  | ENSG00000172292 | <i>CERS6</i>         | Adipose-Visceral-Omentum            | 4.67914154219e-05 |
| rs7034200 | ENSG00000106686 | <i>SPATA6L</i>       | Heart-Atrial-Appendage              | 3.24945597547e-05 |
| rs7034200 | ENSG00000107249 | <i>GLIS3</i>         | Cells-Transformed-fibroblasts       | 3.45573413009e-11 |
| rs7034200 | ENSG00000107249 | <i>GLIS3</i>         | Thyroid                             | 0.000119458479636 |
| rs7034200 | ENSG00000147853 | <i>AK3</i>           | Brain-Putamen-basal-ganglia         | 4.56481081455e-06 |
| rs7034200 | ENSG00000182347 | <i>PDSS1P1</i>       | Esophagus-Gastroesophageal-Junction | 3.11010312751e-05 |
| rs7034200 | ENSG00000228322 | <i>RP11-358M14.2</i> | Thyroid                             | 4.11620980493e-05 |
| rs7034200 | ENSG00000230225 | <i>MTND5P14</i>      | Nerve-Tibial                        | 0.000102595276953 |
| rs7034200 | ENSG00000235326 | <i>XXX</i>           | Stomach                             | 7.05416646715e-05 |
| rs7034200 | ENSG00000237009 | <i>GLIS3-AS1</i>     | Cells-Transformed-fibroblasts       | 1.5014164511e-08  |
| rs780094  | ENSG00000084734 | <i>GCKR</i>          | Spleen                              | 7.2120706573e-16  |
| rs780094  | ENSG00000084734 | <i>GCKR</i>          | Thyroid                             | 2.79663819232e-09 |
| rs780094  | ENSG00000084774 | <i>CAD</i>           | Thyroid                             | 5.43528025657e-06 |
| rs780094  | ENSG00000115216 | <i>NRBP1</i>         | Adipose-Subcutaneous                | 6.33052712903e-10 |
| rs780094  | ENSG00000115216 | <i>NRBP1</i>         | Adipose-Visceral-Omentum            | 9.96713371471e-06 |
| rs780094  | ENSG00000115216 | <i>NRBP1</i>         | Adrenal-Gland                       | 3.81105034801e-05 |

|          |                 |               |                                   |                   |
|----------|-----------------|---------------|-----------------------------------|-------------------|
| rs780094 | ENSG00000115216 | <i>NRBP1</i>  | Artery-Aorta                      | 9.15815289491e-06 |
| rs780094 | ENSG00000115216 | <i>NRBP1</i>  | Artery-Coronary                   | 5.11596337923e-05 |
| rs780094 | ENSG00000115216 | <i>NRBP1</i>  | Artery-Tibial                     | 1.83676732572e-06 |
| rs780094 | ENSG00000115216 | <i>NRBP1</i>  | Cells-EBV-transformed-lymphocytes | 1.46844818731e-08 |
| rs780094 | ENSG00000115216 | <i>NRBP1</i>  | Cells-Transformed-fibroblasts     | 4.22153030192e-09 |
| rs780094 | ENSG00000115216 | <i>NRBP1</i>  | Colon-Transverse                  | 5.96150273596e-12 |
| rs780094 | ENSG00000115216 | <i>NRBP1</i>  | Esophagus-Mucosa                  | 5.93300774324e-07 |
| rs780094 | ENSG00000115216 | <i>NRBP1</i>  | Esophagus-Muscularis              | 4.81306905877e-06 |
| rs780094 | ENSG00000115216 | <i>NRBP1</i>  | Lung                              | 9.24479524465e-08 |
| rs780094 | ENSG00000115216 | <i>NRBP1</i>  | Nerve-Tibial                      | 1.52854205395e-06 |
| rs780094 | ENSG00000115216 | <i>NRBP1</i>  | Skin-Not-Sun-Exposed-Suprapubic   | 8.45643939211e-14 |
| rs780094 | ENSG00000115216 | <i>NRBP1</i>  | Skin-Sun-Exposed-Lower-leg        | 5.69488821675e-16 |
| rs780094 | ENSG00000115216 | <i>NRBP1</i>  | Testis                            | 3.61393652831e-07 |
| rs780094 | ENSG00000115216 | <i>NRBP1</i>  | Thyroid                           | 4.76671891923e-06 |
| rs780094 | ENSG00000115216 | <i>NRBP1</i>  | Whole-Blood                       | 1.00741937894e-11 |
| rs780094 | ENSG00000115226 | <i>FNDC4</i>  | Spleen                            | 7.29173952836e-19 |
| rs780094 | ENSG00000115226 | <i>FNDC4</i>  | Thyroid                           | 7.85233691869e-22 |
| rs780094 | ENSG00000115234 | <i>SNX17</i>  | Artery-Tibial                     | 3.05445090118e-06 |
| rs780094 | ENSG00000115234 | <i>SNX17</i>  | Heart-Left-Ventricle              | 2.63905873533e-05 |
| rs780094 | ENSG00000115234 | <i>SNX17</i>  | Muscle-Skeletal                   | 2.31809754253e-54 |
| rs780094 | ENSG00000115234 | <i>SNX17</i>  | Ovary                             | 6.42403837308e-05 |
| rs780094 | ENSG00000115241 | <i>PPM1G</i>  | Adipose-Subcutaneous              | 1.64518363222e-07 |
| rs780094 | ENSG00000115241 | <i>PPM1G</i>  | Artery-Tibial                     | 0.000127176868123 |
| rs780094 | ENSG00000115241 | <i>PPM1G</i>  | Esophagus-Muscularis              | 7.02182582115e-06 |
| rs780094 | ENSG00000115241 | <i>PPM1G</i>  | Heart-Atrial-Appendage            | 3.34090082833e-05 |
| rs780094 | ENSG00000115241 | <i>PPM1G</i>  | Skin-Sun-Exposed-Lower-leg        | 6.81873664966e-08 |
| rs780094 | ENSG00000115241 | <i>PPM1G</i>  | Thyroid                           | 5.92296997261e-08 |
| rs780094 | ENSG00000115241 | <i>PPM1G</i>  | Uterus                            | 6.2203422555e-05  |
| rs780094 | ENSG00000115241 | <i>PPM1G</i>  | Whole-Blood                       | 5.08418221184e-06 |
| rs780094 | ENSG00000138002 | <i>IFT172</i> | Cells-Transformed-fibroblasts     | 6.43149009709e-06 |
| rs780094 | ENSG00000138002 | <i>IFT172</i> | Spleen                            | 3.40766307931e-06 |
| rs780094 | ENSG00000138074 | <i>SLC5A6</i> | Nerve-Tibial                      | 2.59687895514e-07 |
| rs780094 | ENSG00000138085 | <i>ATRAID</i> | Adipose-Subcutaneous              | 3.64204133511e-06 |
| rs780094 | ENSG00000138085 | <i>ATRAID</i> | Cells-Transformed-fibroblasts     | 4.22656091471e-05 |
| rs780094 | ENSG00000138085 | <i>ATRAID</i> | Esophagus-Mucosa                  | 7.033199084e-05   |
| rs780094 | ENSG00000138085 | <i>ATRAID</i> | Stomach                           | 5.60184149184e-06 |

|          |                 |                    |                                     |                   |
|----------|-----------------|--------------------|-------------------------------------|-------------------|
| rs780094 | ENSG00000157992 | <i>KRTCAP3</i>     | Adipose-Visceral-Omentum            | 1.19630711398e-05 |
| rs780094 | ENSG00000157992 | <i>KRTCAP3</i>     | Adrenal-Gland                       | 1.05797393273e-09 |
| rs780094 | ENSG00000157992 | <i>KRTCAP3</i>     | Artery-Tibial                       | 4.84310273246e-05 |
| rs780094 | ENSG00000157992 | <i>KRTCAP3</i>     | Esophagus-Mucosa                    | 1.70988526206e-05 |
| rs780094 | ENSG00000157992 | <i>KRTCAP3</i>     | Muscle-Skeletal                     | 3.46830497049e-09 |
| rs780094 | ENSG00000157992 | <i>KRTCAP3</i>     | Nerve-Tibial                        | 7.76622325277e-05 |
| rs780094 | ENSG00000157992 | <i>KRTCAP3</i>     | Skin-Sun-Exposed-Lower-leg          | 2.65054404226e-07 |
| rs780094 | ENSG00000157992 | <i>KRTCAP3</i>     | Spleen                              | 2.47712057827e-06 |
| rs780094 | ENSG00000157992 | <i>KRTCAP3</i>     | Testis                              | 2.64461487969e-05 |
| rs780094 | ENSG00000157992 | <i>KRTCAP3</i>     | Thyroid                             | 2.90732976901e-10 |
| rs780094 | ENSG00000157992 | <i>KRTCAP3</i>     | Whole-Blood                         | 7.43521124449e-10 |
| rs780094 | ENSG00000163792 | <i>TCF23</i>       | Adipose-Visceral-Omentum            | 7.94940472883e-05 |
| rs780094 | ENSG00000163798 | <i>SLC4A1AP</i>    | Artery-Aorta                        | 8.37212983625e-05 |
| rs780094 | ENSG00000163798 | <i>SLC4A1AP</i>    | Cells-Transformed-fibroblasts       | 5.15024966235e-05 |
| rs780094 | ENSG00000163798 | <i>SLC4A1AP</i>    | Esophagus-Mucosa                    | 4.98374023788e-05 |
| rs780094 | ENSG00000171174 | <i>RBKS</i>        | Muscle-Skeletal                     | 0.000105831011626 |
| rs780094 | ENSG00000176714 | <i>CCDC121</i>     | Spleen                              | 5.68372729174e-05 |
| rs780094 | ENSG00000198522 | <i>GPN1</i>        | Muscle-Skeletal                     | 3.37539746694e-05 |
| rs780094 | ENSG00000229122 | <i>AGBL5-IT1</i>   | Artery-Coronary                     | 7.44343823279e-05 |
| rs780094 | ENSG00000234072 | <i>AC074117.10</i> | Adipose-Subcutaneous                | 3.34633866994e-08 |
| rs780094 | ENSG00000234072 | <i>AC074117.10</i> | Adipose-Visceral-Omentum            | 2.23628163175e-08 |
| rs780094 | ENSG00000234072 | <i>AC074117.10</i> | Adrenal-Gland                       | 1.84123088279e-06 |
| rs780094 | ENSG00000234072 | <i>AC074117.10</i> | Artery-Aorta                        | 1.73896132245e-05 |
| rs780094 | ENSG00000234072 | <i>AC074117.10</i> | Artery-Coronary                     | 2.77309460871e-07 |
| rs780094 | ENSG00000234072 | <i>AC074117.10</i> | Artery-Tibial                       | 1.01841800239e-08 |
| rs780094 | ENSG00000234072 | <i>AC074117.10</i> | Breast-Mammary-Tissue               | 1.57199906534e-08 |
| rs780094 | ENSG00000234072 | <i>AC074117.10</i> | Cells-Transformed-fibroblasts       | 1.85587761851e-22 |
| rs780094 | ENSG00000234072 | <i>AC074117.10</i> | Colon-Sigmoid                       | 6.10223022616e-08 |
| rs780094 | ENSG00000234072 | <i>AC074117.10</i> | Colon-Transverse                    | 4.29107590105e-11 |
| rs780094 | ENSG00000234072 | <i>AC074117.10</i> | Esophagus-Gastroesophageal-Junction | 3.63708645017e-06 |
| rs780094 | ENSG00000234072 | <i>AC074117.10</i> | Esophagus-Mucosa                    | 2.9963483337e-13  |
| rs780094 | ENSG00000234072 | <i>AC074117.10</i> | Esophagus-Muscularis                | 3.66802466316e-10 |
| rs780094 | ENSG00000234072 | <i>AC074117.10</i> | Heart-Atrial-Appendage              | 7.59712639918e-05 |
| rs780094 | ENSG00000234072 | <i>AC074117.10</i> | Liver                               | 6.4682462976e-05  |
| rs780094 | ENSG00000234072 | <i>AC074117.10</i> | Lung                                | 1.36528695798e-10 |
| rs780094 | ENSG00000234072 | <i>AC074117.10</i> | Nerve-Tibial                        | 9.65972368562e-06 |

|           |                 |                      |                                       |                   |
|-----------|-----------------|----------------------|---------------------------------------|-------------------|
| rs780094  | ENSG00000234072 | <i>AC074117.10</i>   | Pancreas                              | 5.12889387587e-05 |
| rs780094  | ENSG00000234072 | <i>AC074117.10</i>   | Pituitary                             | 9.13955202923e-12 |
| rs780094  | ENSG00000234072 | <i>AC074117.10</i>   | Prostate                              | 1.99773648727e-06 |
| rs780094  | ENSG00000234072 | <i>AC074117.10</i>   | Stomach                               | 3.51967258495e-06 |
| rs780094  | ENSG00000234072 | <i>AC074117.10</i>   | Testis                                | 4.75994317682e-10 |
| rs780094  | ENSG00000234072 | <i>AC074117.10</i>   | Thyroid                               | 6.08245717637e-20 |
| rs780094  | ENSG00000234072 | <i>AC074117.10</i>   | Vagina                                | 3.58166998524e-06 |
| rs780094  | ENSG00000235267 | <i>AC074117.13</i>   | Breast-Mammary-Tissue                 | 8.89875153068e-05 |
| rs780094  | ENSG00000235267 | <i>AC074117.13</i>   | Skin-Sun-Exposed-Lower-leg            | 3.74525571406e-05 |
| rs780094  | ENSG00000270210 | <i>RP11-373D23.3</i> | Esophagus-Mucosa                      | 4.63691181885e-05 |
| rs780094  | ENSG00000270210 | <i>RP11-373D23.3</i> | Stomach                               | 9.26771051729e-05 |
| rs780094  | ENSG00000270210 | <i>RP11-373D23.3</i> | Thyroid                               | 9.64224174215e-05 |
| rs7944584 | ENSG00000025434 | <i>NR1H3</i>         | Artery-Aorta                          | 2.08009361483e-05 |
| rs7944584 | ENSG00000025434 | <i>NR1H3</i>         | Brain-Hypothalamus                    | 1.22697126085e-07 |
| rs7944584 | ENSG00000025434 | <i>NR1H3</i>         | Brain-Nucleus-accumbens-basal-ganglia | 0.000131733330946 |
| rs7944584 | ENSG00000025434 | <i>NR1H3</i>         | Cells-EBV-transformed-lymphocytes     | 2.29707271199e-10 |
| rs7944584 | ENSG00000025434 | <i>NR1H3</i>         | Cells-Transformed-fibroblasts         | 1.15434837914e-05 |
| rs7944584 | ENSG00000025434 | <i>NR1H3</i>         | Nerve-Tibial                          | 7.20595223102e-05 |
| rs7944584 | ENSG00000030066 | <i>NUP160</i>        | Esophagus-Gastroesophageal-Junction   | 5.51250147279e-05 |
| rs7944584 | ENSG00000109919 | <i>MTCH2</i>         | Brain-Nucleus-accumbens-basal-ganglia | 1.20137805688e-06 |
| rs7944584 | ENSG00000109919 | <i>MTCH2</i>         | Muscle-Skeletal                       | 8.05066517251e-07 |
| rs7944584 | ENSG00000109919 | <i>MTCH2</i>         | Skin-Sun-Exposed-Lower-leg            | 8.53451748775e-05 |
| rs7944584 | ENSG00000109920 | <i>FNBP4</i>         | Cells-Transformed-fibroblasts         | 1.32732752938e-06 |
| rs7944584 | ENSG00000109920 | <i>FNBP4</i>         | Muscle-Skeletal                       | 8.89603654962e-07 |
| rs7944584 | ENSG00000110492 | <i>MDK</i>           | Artery-Tibial                         | 9.73202258852e-06 |
| rs7944584 | ENSG00000110514 | <i>MADD</i>          | Adipose-Subcutaneous                  | 7.59998823807e-05 |
| rs7944584 | ENSG00000110514 | <i>MADD</i>          | Adipose-Visceral-Omentum              | 0.00012158221747  |
| rs7944584 | ENSG00000110514 | <i>MADD</i>          | Adrenal-Gland                         | 2.2163994994e-05  |
| rs7944584 | ENSG00000110514 | <i>MADD</i>          | Artery-Tibial                         | 8.90121801072e-08 |
| rs7944584 | ENSG00000110514 | <i>MADD</i>          | Breast-Mammary-Tissue                 | 8.77616409944e-05 |
| rs7944584 | ENSG00000110514 | <i>MADD</i>          | Cells-Transformed-fibroblasts         | 4.94513410518e-09 |
| rs7944584 | ENSG00000110514 | <i>MADD</i>          | Colon-Transverse                      | 6.3042408978e-06  |
| rs7944584 | ENSG00000110514 | <i>MADD</i>          | Esophagus-Mucosa                      | 3.4527574667e-09  |
| rs7944584 | ENSG00000110514 | <i>MADD</i>          | Heart-Atrial-Appendage                | 3.17991729758e-08 |
| rs7944584 | ENSG00000110514 | <i>MADD</i>          | Heart-Left-Ventricle                  | 2.457378901e-05   |
| rs7944584 | ENSG00000110514 | <i>MADD</i>          | Muscle-Skeletal                       | 7.85528914203e-05 |

|           |                 |                 |                                     |                   |
|-----------|-----------------|-----------------|-------------------------------------|-------------------|
| rs7944584 | ENSG00000110514 | <i>MADD</i>     | Nerve-Tibial                        | 3.26145755213e-05 |
| rs7944584 | ENSG00000110514 | <i>MADD</i>     | Pancreas                            | 4.17482675702e-07 |
| rs7944584 | ENSG00000110514 | <i>MADD</i>     | Pituitary                           | 1.72076652188e-11 |
| rs7944584 | ENSG00000110514 | <i>MADD</i>     | Thyroid                             | 4.79922519912e-06 |
| rs7944584 | ENSG00000110514 | <i>MADD</i>     | Vagina                              | 0.000122105725593 |
| rs7944584 | ENSG00000110514 | <i>MADD</i>     | Whole-Blood                         | 2.16060782194e-05 |
| rs7944584 | ENSG00000123444 | <i>KBTBD4</i>   | Esophagus-Gastroesophageal-Junction | 4.87252662217e-05 |
| rs7944584 | ENSG00000134569 | <i>LRP4</i>     | Nerve-Tibial                        | 2.27800965124e-10 |
| rs7944584 | ENSG00000134569 | <i>LRP4</i>     | Pancreas                            | 9.48225523427e-07 |
| rs7944584 | ENSG00000134571 | <i>MYBPC3</i>   | Heart-Atrial-Appendage              | 7.05925424226e-05 |
| rs7944584 | ENSG00000134571 | <i>MYBPC3</i>   | Lung                                | 3.15496228313e-05 |
| rs7944584 | ENSG00000134571 | <i>MYBPC3</i>   | Nerve-Tibial                        | 4.79897016865e-05 |
| rs7944584 | ENSG00000134571 | <i>MYBPC3</i>   | Whole-Blood                         | 3.72029557362e-10 |
| rs7944584 | ENSG00000134574 | <i>DDB2</i>     | Esophagus-Mucosa                    | 0.000125985422351 |
| rs7944584 | ENSG00000134575 | <i>ACP2</i>     | Adipose-Subcutaneous                | 7.68755973373e-06 |
| rs7944584 | ENSG00000134575 | <i>ACP2</i>     | Adipose-Visceral-Omentum            | 1.27104258893e-05 |
| rs7944584 | ENSG00000134575 | <i>ACP2</i>     | Cells-EBV-transformed-lymphocytes   | 1.07620921425e-08 |
| rs7944584 | ENSG00000134575 | <i>ACP2</i>     | Cells-Transformed-fibroblasts       | 0.000121806366566 |
| rs7944584 | ENSG00000134575 | <i>ACP2</i>     | Esophagus-Mucosa                    | 2.73364543661e-14 |
| rs7944584 | ENSG00000134575 | <i>ACP2</i>     | Heart-Atrial-Appendage              | 1.20233194782e-06 |
| rs7944584 | ENSG00000134575 | <i>ACP2</i>     | Heart-Left-Ventricle                | 1.56687990124e-09 |
| rs7944584 | ENSG00000134575 | <i>ACP2</i>     | Lung                                | 5.19595924101e-08 |
| rs7944584 | ENSG00000134575 | <i>ACP2</i>     | Muscle-Skeletal                     | 0.00013144342915  |
| rs7944584 | ENSG00000134575 | <i>ACP2</i>     | Nerve-Tibial                        | 2.61766719937e-06 |
| rs7944584 | ENSG00000134575 | <i>ACP2</i>     | Skin-Sun-Exposed-Lower-leg          | 1.07143020893e-17 |
| rs7944584 | ENSG00000134575 | <i>ACP2</i>     | Spleen                              | 1.33254214111e-05 |
| rs7944584 | ENSG00000134575 | <i>ACP2</i>     | Thyroid                             | 3.40882048091e-15 |
| rs7944584 | ENSG00000134575 | <i>ACP2</i>     | Whole-Blood                         | 1.43425178272e-20 |
| rs7944584 | ENSG00000149179 | <i>C11orf49</i> | Artery-Coronary                     | 5.67565971147e-05 |
| rs7944584 | ENSG00000149179 | <i>C11orf49</i> | Nerve-Tibial                        | 0.00012048675964  |
| rs7944584 | ENSG00000149182 | <i>ARFGAP2</i>  | Artery-Tibial                       | 6.29133475824e-05 |
| rs7944584 | ENSG00000149187 | <i>CELF1</i>    | Nerve-Tibial                        | 2.50584748447e-05 |
| rs7944584 | ENSG00000165912 | <i>PACSIN3</i>  | Artery-Aorta                        | 1.1604680458e-05  |
| rs7944584 | ENSG00000165912 | <i>PACSIN3</i>  | Esophagus-Mucosa                    | 1.28324437184e-11 |
| rs7944584 | ENSG00000165912 | <i>PACSIN3</i>  | Skin-Sun-Exposed-Lower-leg          | 3.63199545474e-05 |
| rs7944584 | ENSG00000165912 | <i>PACSIN3</i>  | Spleen                              | 6.6725849258e-07  |



|           |                 |                     |                                   |                   |
|-----------|-----------------|---------------------|-----------------------------------|-------------------|
| rs7944584 | ENSG00000165912 | <i>PACSIN3</i>      | Thyroid                           | 7.9096234924e-07  |
| rs7944584 | ENSG00000165916 | <i>PSMC3</i>        | Adipose-Subcutaneous              | 2.34072925216e-05 |
| rs7944584 | ENSG00000165916 | <i>PSMC3</i>        | Cells-Transformed-fibroblasts     | 2.04305253074e-06 |
| rs7944584 | ENSG00000165916 | <i>PSMC3</i>        | Prostate                          | 5.33810723515e-06 |
| rs7944584 | ENSG00000165916 | <i>PSMC3</i>        | Skin-Sun-Exposed-Lower-leg        | 3.11248061392e-06 |
| rs7944584 | ENSG00000165916 | <i>PSMC3</i>        | Thyroid                           | 4.08398212744e-05 |
| rs7944584 | ENSG00000165916 | <i>PSMC3</i>        | Uterus                            | 7.16490580163e-05 |
| rs7944584 | ENSG00000165917 | <i>RAPSN</i>        | Nerve-Tibial                      | 8.62453385564e-05 |
| rs7944584 | ENSG00000165917 | <i>RAPSN</i>        | Skin-Sun-Exposed-Lower-leg        | 1.80631527423e-06 |
| rs7944584 | ENSG00000165917 | <i>RAPSN</i>        | Thyroid                           | 1.20524036929e-07 |
| rs7944584 | ENSG00000172247 | <i>C1QTNF4</i>      | Adipose-Subcutaneous              | 3.56810013653e-34 |
| rs7944584 | ENSG00000172247 | <i>C1QTNF4</i>      | Artery-Aorta                      | 1.24998255811e-09 |
| rs7944584 | ENSG00000172247 | <i>C1QTNF4</i>      | Artery-Coronary                   | 1.33459962796e-05 |
| rs7944584 | ENSG00000172247 | <i>C1QTNF4</i>      | Artery-Tibial                     | 4.45064032939e-11 |
| rs7944584 | ENSG00000172247 | <i>C1QTNF4</i>      | Breast-Mammary-Tissue             | 5.84525478966e-10 |
| rs7944584 | ENSG00000172247 | <i>C1QTNF4</i>      | Cells-EBV-transformed-lymphocytes | 1.28865421506e-08 |
| rs7944584 | ENSG00000172247 | <i>C1QTNF4</i>      | Cells-Transformed-fibroblasts     | 5.38201805563e-10 |
| rs7944584 | ENSG00000172247 | <i>C1QTNF4</i>      | Colon-Transverse                  | 2.04967618837e-10 |
| rs7944584 | ENSG00000172247 | <i>C1QTNF4</i>      | Esophagus-Mucosa                  | 2.78374518782e-08 |
| rs7944584 | ENSG00000172247 | <i>C1QTNF4</i>      | Heart-Atrial-Appendage            | 1.13484278922e-08 |
| rs7944584 | ENSG00000172247 | <i>C1QTNF4</i>      | Liver                             | 3.31423676529e-09 |
| rs7944584 | ENSG00000172247 | <i>C1QTNF4</i>      | Lung                              | 3.85455422061e-22 |
| rs7944584 | ENSG00000172247 | <i>C1QTNF4</i>      | Muscle-Skeletal                   | 1.42762821593e-17 |
| rs7944584 | ENSG00000172247 | <i>C1QTNF4</i>      | Nerve-Tibial                      | 8.61270858773e-20 |
| rs7944584 | ENSG00000172247 | <i>C1QTNF4</i>      | Skin-Sun-Exposed-Lower-leg        | 1.04949880433e-28 |
| rs7944584 | ENSG00000172247 | <i>C1QTNF4</i>      | Spleen                            | 4.24043916056e-15 |
| rs7944584 | ENSG00000172247 | <i>C1QTNF4</i>      | Thyroid                           | 9.53527705852e-05 |
| rs7944584 | ENSG00000172247 | <i>C1QTNF4</i>      | Whole-Blood                       | 5.13079512637e-10 |
| rs7944584 | ENSG00000247675 | <i>LRP4-AS1</i>     | Nerve-Tibial                      | 9.25170624531e-09 |
| rs7944584 | ENSG00000247675 | <i>LRP4-AS1</i>     | Pancreas                          | 5.93014122957e-05 |
| rs7944584 | ENSG00000271350 | <i>CTD-2384B9.1</i> | Nerve-Tibial                      | 2.14845905703e-05 |
| rs7944584 | ENSG00000271557 | <i>YPEL5P2</i>      | Nerve-Tibial                      | 7.51699584443e-05 |

**Table S3.** Potential colocalization loci for FP phenotype. Colocation loci consists of two summary statistics. One summary statistics obtained FP GWAS and the other summary statistics obtained for one of the genes in GTEx. Thus, we obtained these potential colocalization loci by considering the variants which are reported significant in previous study [?] for FP phenotype in MAGIC dataset. For each significant variant, we consider 50 variants upstream and downstream of the significant variants to define a locus. Next, we consider genes for all the tissues in GTEx data where at least one of the variants in the locus are significantly associated (corrected multiple hypothesis p-value of  $10^{-5}$  or more significant) with its gene expression. We consider all the 44 tissues in GTEx to obtain the list of genes for each significant GWAS SNP.

| rsID       | Ensembl ID      | Gene Name     | Tissue                                | eQTL p-values     |
|------------|-----------------|---------------|---------------------------------------|-------------------|
| rs10501320 | ENSG00000025434 | <i>NR1H3</i>  | Artery-Aorta                          | 2.08009361483e-05 |
| rs10501320 | ENSG00000025434 | <i>NR1H3</i>  | Brain-Hypothalamus                    | 1.22697126085e-07 |
| rs10501320 | ENSG00000025434 | <i>NR1H3</i>  | Brain-Nucleus-accumbens-basal-ganglia | 0.000131733330946 |
| rs10501320 | ENSG00000025434 | <i>NR1H3</i>  | Cells-Transformed-fibroblasts         | 1.85933794358e-05 |
| rs10501320 | ENSG00000025434 | <i>NR1H3</i>  | Nerve-Tibial                          | 7.20595223102e-05 |
| rs10501320 | ENSG00000025434 | <i>NR1H3</i>  | Testis                                | 2.37790021124e-07 |
| rs10501320 | ENSG00000030066 | <i>NUP160</i> | Spleen                                | 0.000116421914784 |
| rs10501320 | ENSG00000109919 | <i>MTCH2</i>  | Skin-Sun-Exposed-Lower-leg            | 8.53451748775e-05 |
| rs10501320 | ENSG00000109919 | <i>MTCH2</i>  | Testis                                | 3.37267588819e-05 |
| rs10501320 | ENSG00000109920 | <i>FNBP4</i>  | Muscle-Skeletal                       | 8.89603654962e-07 |
| rs10501320 | ENSG00000110492 | <i>MDK</i>    | Artery-Tibial                         | 9.73202258852e-06 |
| rs10501320 | ENSG00000110514 | <i>MADD</i>   | Adipose-Subcutaneous                  | 0.000112857498127 |
| rs10501320 | ENSG00000110514 | <i>MADD</i>   | Adrenal-Gland                         | 2.2163994994e-05  |
| rs10501320 | ENSG00000110514 | <i>MADD</i>   | Artery-Aorta                          | 0.000122351334124 |
| rs10501320 | ENSG00000110514 | <i>MADD</i>   | Artery-Tibial                         | 8.90121801072e-08 |
| rs10501320 | ENSG00000110514 | <i>MADD</i>   | Cells-Transformed-fibroblasts         | 4.94513410518e-09 |
| rs10501320 | ENSG00000110514 | <i>MADD</i>   | Esophagus-Mucosa                      | 3.4527574667e-09  |
| rs10501320 | ENSG00000110514 | <i>MADD</i>   | Heart-Atrial-Appendage                | 3.17991729758e-08 |
| rs10501320 | ENSG00000110514 | <i>MADD</i>   | Heart-Left-Ventricle                  | 2.457378901e-05   |
| rs10501320 | ENSG00000110514 | <i>MADD</i>   | Muscle-Skeletal                       | 7.85528914203e-05 |
| rs10501320 | ENSG00000110514 | <i>MADD</i>   | Nerve-Tibial                          | 3.26145755213e-05 |
| rs10501320 | ENSG00000110514 | <i>MADD</i>   | Pancreas                              | 4.17482675702e-07 |
| rs10501320 | ENSG00000110514 | <i>MADD</i>   | Pituitary                             | 1.72076652188e-11 |
| rs10501320 | ENSG00000110514 | <i>MADD</i>   | Testis                                | 2.16618984585e-07 |
| rs10501320 | ENSG00000110514 | <i>MADD</i>   | Vagina                                | 0.000122105725593 |
| rs10501320 | ENSG00000134569 | <i>LRP4</i>   | Nerve-Tibial                          | 6.19405876199e-31 |
| rs10501320 | ENSG00000134569 | <i>LRP4</i>   | Pancreas                              | 4.0536511969e-16  |
| rs10501320 | ENSG00000134569 | <i>LRP4</i>   | Spleen                                | 4.61451279373e-05 |
| rs10501320 | ENSG00000134571 | <i>MYBPC3</i> | Heart-Atrial-Appendage                | 7.05925424226e-05 |

|            |                 |                 |                                 |                   |
|------------|-----------------|-----------------|---------------------------------|-------------------|
| rs10501320 | ENSG00000134571 | <i>MYBPC3</i>   | Nerve-Tibial                    | 4.79897016865e-05 |
| rs10501320 | ENSG00000134574 | <i>DDB2</i>     | Esophagus-Mucosa                | 0.000125985422351 |
| rs10501320 | ENSG00000134574 | <i>DDB2</i>     | Heart-Atrial-Appendage          | 2.44184886821e-05 |
| rs10501320 | ENSG00000134574 | <i>DDB2</i>     | Muscle-Skeletal                 | 6.10776590083e-05 |
| rs10501320 | ENSG00000134574 | <i>DDB2</i>     | Skin-Sun-Exposed-Lower-leg      | 2.43673646413e-10 |
| rs10501320 | ENSG00000134575 | <i>ACP2</i>     | Adipose-Subcutaneous            | 7.68755973373e-06 |
| rs10501320 | ENSG00000134575 | <i>ACP2</i>     | Esophagus-Mucosa                | 2.73364543661e-14 |
| rs10501320 | ENSG00000134575 | <i>ACP2</i>     | Heart-Atrial-Appendage          | 8.70907835138e-07 |
| rs10501320 | ENSG00000134575 | <i>ACP2</i>     | Heart-Left-Ventricle            | 1.56687990124e-09 |
| rs10501320 | ENSG00000134575 | <i>ACP2</i>     | Lung                            | 6.76675705027e-08 |
| rs10501320 | ENSG00000134575 | <i>ACP2</i>     | Muscle-Skeletal                 | 0.00013144342915  |
| rs10501320 | ENSG00000134575 | <i>ACP2</i>     | Nerve-Tibial                    | 2.61766719937e-06 |
| rs10501320 | ENSG00000134575 | <i>ACP2</i>     | Skin-Not-Sun-Exposed-Suprapubic | 2.55612655967e-06 |
| rs10501320 | ENSG00000134575 | <i>ACP2</i>     | Skin-Sun-Exposed-Lower-leg      | 1.07143020893e-17 |
| rs10501320 | ENSG00000134575 | <i>ACP2</i>     | Spleen                          | 1.88165296359e-05 |
| rs10501320 | ENSG00000134575 | <i>ACP2</i>     | Vagina                          | 4.65323577258e-05 |
| rs10501320 | ENSG00000149179 | <i>C11orf49</i> | Adipose-Subcutaneous            | 5.67865942461e-05 |
| rs10501320 | ENSG00000149179 | <i>C11orf49</i> | Adrenal-Gland                   | 1.24023663745e-05 |
| rs10501320 | ENSG00000149179 | <i>C11orf49</i> | Esophagus-Mucosa                | 8.92232838988e-05 |
| rs10501320 | ENSG00000149179 | <i>C11orf49</i> | Pancreas                        | 3.3055837935e-05  |
| rs10501320 | ENSG00000149179 | <i>C11orf49</i> | Skin-Not-Sun-Exposed-Suprapubic | 7.37619039844e-06 |
| rs10501320 | ENSG00000149179 | <i>C11orf49</i> | Skin-Sun-Exposed-Lower-leg      | 5.48944677851e-05 |
| rs10501320 | ENSG00000149179 | <i>C11orf49</i> | Testis                          | 4.29749081422e-40 |
| rs10501320 | ENSG00000149182 | <i>ARFGAP2</i>  | Artery-Tibial                   | 6.29133475824e-05 |
| rs10501320 | ENSG00000149187 | <i>CELF1</i>    | Prostate                        | 1.61381245588e-05 |
| rs10501320 | ENSG00000165912 | <i>PACSIN3</i>  | Adipose-Subcutaneous            | 2.28866958376e-08 |
| rs10501320 | ENSG00000165912 | <i>PACSIN3</i>  | Artery-Aorta                    | 1.1604680458e-05  |
| rs10501320 | ENSG00000165912 | <i>PACSIN3</i>  | Artery-Tibial                   | 7.62404655532e-05 |
| rs10501320 | ENSG00000165912 | <i>PACSIN3</i>  | Cells-Transformed-fibroblasts   | 4.88531471913e-05 |
| rs10501320 | ENSG00000165912 | <i>PACSIN3</i>  | Esophagus-Mucosa                | 1.41971075144e-16 |
| rs10501320 | ENSG00000165912 | <i>PACSIN3</i>  | Lung                            | 2.60370308594e-05 |
| rs10501320 | ENSG00000165912 | <i>PACSIN3</i>  | Nerve-Tibial                    | 9.24482319333e-06 |
| rs10501320 | ENSG00000165912 | <i>PACSIN3</i>  | Ovary                           | 2.39257187744e-05 |
| rs10501320 | ENSG00000165912 | <i>PACSIN3</i>  | Skin-Not-Sun-Exposed-Suprapubic | 3.11218769563e-07 |
| rs10501320 | ENSG00000165912 | <i>PACSIN3</i>  | Skin-Sun-Exposed-Lower-leg      | 8.66082412293e-14 |
| rs10501320 | ENSG00000165912 | <i>PACSIN3</i>  | Spleen                          | 4.42663115843e-24 |

|            |                 |                     |                                       |                   |
|------------|-----------------|---------------------|---------------------------------------|-------------------|
| rs10501320 | ENSG00000165916 | <i>PSMC3</i>        | Prostate                              | 2.03094319084e-05 |
| rs10501320 | ENSG00000165916 | <i>PSMC3</i>        | Skin-Not-Sun-Exposed-Suprapubic       | 2.37308417946e-06 |
| rs10501320 | ENSG00000165916 | <i>PSMC3</i>        | Skin-Sun-Exposed-Lower-leg            | 7.04354880272e-05 |
| rs10501320 | ENSG00000165917 | <i>RAPSN</i>        | Skin-Sun-Exposed-Lower-leg            | 1.10308263023e-05 |
| rs10501320 | ENSG00000172247 | <i>C1QTNF4</i>      | Adipose-Subcutaneous                  | 4.33882899494e-18 |
| rs10501320 | ENSG00000172247 | <i>C1QTNF4</i>      | Artery-Aorta                          | 2.48213996867e-06 |
| rs10501320 | ENSG00000172247 | <i>C1QTNF4</i>      | Artery-Tibial                         | 5.87064915435e-07 |
| rs10501320 | ENSG00000172247 | <i>C1QTNF4</i>      | Breast-Mammary-Tissue                 | 3.75016221147e-06 |
| rs10501320 | ENSG00000172247 | <i>C1QTNF4</i>      | Cells-Transformed-fibroblasts         | 2.56325964789e-09 |
| rs10501320 | ENSG00000172247 | <i>C1QTNF4</i>      | Esophagus-Mucosa                      | 2.49274783481e-06 |
| rs10501320 | ENSG00000172247 | <i>C1QTNF4</i>      | Liver                                 | 2.1273359988e-06  |
| rs10501320 | ENSG00000172247 | <i>C1QTNF4</i>      | Lung                                  | 3.49787806374e-14 |
| rs10501320 | ENSG00000172247 | <i>C1QTNF4</i>      | Muscle-Skeletal                       | 8.54914979219e-10 |
| rs10501320 | ENSG00000172247 | <i>C1QTNF4</i>      | Nerve-Tibial                          | 6.28029313008e-15 |
| rs10501320 | ENSG00000172247 | <i>C1QTNF4</i>      | Skin-Not-Sun-Exposed-Suprapubic       | 4.37740702424e-08 |
| rs10501320 | ENSG00000172247 | <i>C1QTNF4</i>      | Skin-Sun-Exposed-Lower-leg            | 3.28530648014e-20 |
| rs10501320 | ENSG00000172247 | <i>C1QTNF4</i>      | Spleen                                | 5.88313478203e-10 |
| rs10501320 | ENSG00000175213 | <i>ZNF408</i>       | Prostate                              | 0.000131597414623 |
| rs10501320 | ENSG00000175216 | <i>CKAP5</i>        | Esophagus-Mucosa                      | 2.67017759846e-05 |
| rs10501320 | ENSG00000175220 | <i>ARHGAP1</i>      | Adipose-Subcutaneous                  | 2.70869806044e-05 |
| rs10501320 | ENSG00000175220 | <i>ARHGAP1</i>      | Esophagus-Mucosa                      | 9.82992146555e-05 |
| rs10501320 | ENSG00000175220 | <i>ARHGAP1</i>      | Muscle-Skeletal                       | 4.12167429416e-06 |
| rs10501320 | ENSG00000175220 | <i>ARHGAP1</i>      | Nerve-Tibial                          | 2.56649373374e-07 |
| rs10501320 | ENSG00000175220 | <i>ARHGAP1</i>      | Pancreas                              | 2.00284121539e-05 |
| rs10501320 | ENSG00000175220 | <i>ARHGAP1</i>      | Skin-Sun-Exposed-Lower-leg            | 1.21286296661e-06 |
| rs10501320 | ENSG00000180210 | <i>F2</i>           | Esophagus-Gastroesophageal-Junction   | 2.61053625474e-05 |
| rs10501320 | ENSG00000247675 | <i>LRP4-AS1</i>     | Nerve-Tibial                          | 3.43522823913e-23 |
| rs10501320 | ENSG00000247675 | <i>LRP4-AS1</i>     | Pancreas                              | 1.183642192e-09   |
| rs10501320 | ENSG00000255520 | <i>RP11-390K5.3</i> | Testis                                | 1.77294876648e-05 |
| rs10501320 | ENSG00000271350 | <i>CTD-2384B9.1</i> | Nerve-Tibial                          | 1.46490579413e-16 |
| rs10501320 | ENSG00000271350 | <i>CTD-2384B9.1</i> | Testis                                | 1.85993958717e-42 |
| rs10501320 | ENSG00000271557 | <i>YPEL5P2</i>      | Nerve-Tibial                          | 7.51699584443e-05 |
| rs10838687 | ENSG00000025434 | <i>NR1H3</i>        | Brain-Hypothalamus                    | 1.22697126085e-07 |
| rs10838687 | ENSG00000025434 | <i>NR1H3</i>        | Brain-Nucleus-accumbens-basal-ganglia | 0.000131733330946 |
| rs10838687 | ENSG00000025434 | <i>NR1H3</i>        | Nerve-Tibial                          | 7.20595223102e-05 |
| rs10838687 | ENSG00000025434 | <i>NR1H3</i>        | Testis                                | 2.37790021124e-07 |

|            |                 |                 |                                       |                   |
|------------|-----------------|-----------------|---------------------------------------|-------------------|
| rs10838687 | ENSG00000030066 | <i>NUP160</i>   | Spleen                                | 0.000116421914784 |
| rs10838687 | ENSG00000109919 | <i>MTCH2</i>    | Brain-Nucleus-accumbens-basal-ganglia | 0.000120225415365 |
| rs10838687 | ENSG00000109919 | <i>MTCH2</i>    | Esophagus-Muscularis                  | 4.1460701516e-05  |
| rs10838687 | ENSG00000109919 | <i>MTCH2</i>    | Testis                                | 1.99678238221e-05 |
| rs10838687 | ENSG00000109920 | <i>FNBP4</i>    | Muscle-Skeletal                       | 8.89603654962e-07 |
| rs10838687 | ENSG00000110492 | <i>MDK</i>      | Artery-Tibial                         | 9.73202258852e-06 |
| rs10838687 | ENSG00000110514 | <i>MADD</i>     | Adipose-Subcutaneous                  | 7.59998823807e-05 |
| rs10838687 | ENSG00000110514 | <i>MADD</i>     | Artery-Tibial                         | 8.90121801072e-08 |
| rs10838687 | ENSG00000110514 | <i>MADD</i>     | Colon-Transverse                      | 6.3042408978e-06  |
| rs10838687 | ENSG00000110514 | <i>MADD</i>     | Esophagus-Muscularis                  | 1.15946798711e-10 |
| rs10838687 | ENSG00000110514 | <i>MADD</i>     | Heart-Left-Ventricle                  | 2.457378901e-05   |
| rs10838687 | ENSG00000110514 | <i>MADD</i>     | Muscle-Skeletal                       | 7.85528914203e-05 |
| rs10838687 | ENSG00000110514 | <i>MADD</i>     | Nerve-Tibial                          | 3.26145755213e-05 |
| rs10838687 | ENSG00000110514 | <i>MADD</i>     | Pancreas                              | 4.17482675702e-07 |
| rs10838687 | ENSG00000110514 | <i>MADD</i>     | Pituitary                             | 1.72076652188e-11 |
| rs10838687 | ENSG00000110514 | <i>MADD</i>     | Testis                                | 2.16618984585e-07 |
| rs10838687 | ENSG00000110514 | <i>MADD</i>     | Vagina                                | 0.000122105725593 |
| rs10838687 | ENSG00000110514 | <i>MADD</i>     | Whole-Blood                           | 2.16060782194e-05 |
| rs10838687 | ENSG00000123444 | <i>KBTBD4</i>   | Esophagus-Gastroesophageal-Junction   | 4.87252662217e-05 |
| rs10838687 | ENSG00000134569 | <i>LRP4</i>     | Nerve-Tibial                          | 5.19553518572e-14 |
| rs10838687 | ENSG00000134569 | <i>LRP4</i>     | Pancreas                              | 4.37416789409e-09 |
| rs10838687 | ENSG00000134571 | <i>MYBPC3</i>   | Nerve-Tibial                          | 4.79897016865e-05 |
| rs10838687 | ENSG00000134571 | <i>MYBPC3</i>   | Whole-Blood                           | 5.91404606882e-08 |
| rs10838687 | ENSG00000134574 | <i>DDB2</i>     | Muscle-Skeletal                       | 9.04121978266e-05 |
| rs10838687 | ENSG00000134575 | <i>ACP2</i>     | Adipose-Subcutaneous                  | 7.68755973373e-06 |
| rs10838687 | ENSG00000134575 | <i>ACP2</i>     | Adipose-Visceral-Omentum              | 8.70060974368e-06 |
| rs10838687 | ENSG00000134575 | <i>ACP2</i>     | Heart-Left-Ventricle                  | 1.56687990124e-09 |
| rs10838687 | ENSG00000134575 | <i>ACP2</i>     | Muscle-Skeletal                       | 0.00013144342915  |
| rs10838687 | ENSG00000134575 | <i>ACP2</i>     | Nerve-Tibial                          | 2.61766719937e-06 |
| rs10838687 | ENSG00000134575 | <i>ACP2</i>     | Skin-Not-Sun-Exposed-Suprapubic       | 2.55612655967e-06 |
| rs10838687 | ENSG00000134575 | <i>ACP2</i>     | Spleen                                | 1.33254214111e-05 |
| rs10838687 | ENSG00000134575 | <i>ACP2</i>     | Vagina                                | 4.65323577258e-05 |
| rs10838687 | ENSG00000134575 | <i>ACP2</i>     | Whole-Blood                           | 1.43425178272e-20 |
| rs10838687 | ENSG00000149179 | <i>C11orf49</i> | Artery-Coronary                       | 5.67565971147e-05 |
| rs10838687 | ENSG00000149179 | <i>C11orf49</i> | Nerve-Tibial                          | 0.00012048675964  |
| rs10838687 | ENSG00000149179 | <i>C11orf49</i> | Testis                                | 8.65627246025e-08 |

|            |                 |                     |                                     |                   |
|------------|-----------------|---------------------|-------------------------------------|-------------------|
| rs10838687 | ENSG00000149182 | <i>ARFGAP2</i>      | Artery-Tibial                       | 6.29133475824e-05 |
| rs10838687 | ENSG00000149187 | <i>CELF1</i>        | Prostate                            | 1.61381245588e-05 |
| rs10838687 | ENSG00000165912 | <i>PAC SIN3</i>     | Skin-Not-Sun-Exposed-Suprapubic     | 3.11218769563e-07 |
| rs10838687 | ENSG00000165912 | <i>PAC SIN3</i>     | Spleen                              | 6.6725849258e-07  |
| rs10838687 | ENSG00000165915 | <i>SLC39A13</i>     | Esophagus-Muscularis                | 1.45413413333e-05 |
| rs10838687 | ENSG00000165916 | <i>PSMC3</i>        | Adipose-Subcutaneous                | 2.34072925216e-05 |
| rs10838687 | ENSG00000165916 | <i>PSMC3</i>        | Prostate                            | 7.24634191817e-06 |
| rs10838687 | ENSG00000165916 | <i>PSMC3</i>        | Skin-Not-Sun-Exposed-Suprapubic     | 2.37308417946e-06 |
| rs10838687 | ENSG00000165916 | <i>PSMC3</i>        | Uterus                              | 7.16490580163e-05 |
| rs10838687 | ENSG00000165917 | <i>RAPSN</i>        | Nerve-Tibial                        | 8.62453385564e-05 |
| rs10838687 | ENSG00000172247 | <i>C1QTNF4</i>      | Adipose-Subcutaneous                | 4.17124363169e-18 |
| rs10838687 | ENSG00000172247 | <i>C1QTNF4</i>      | Artery-Tibial                       | 5.87064915435e-07 |
| rs10838687 | ENSG00000172247 | <i>C1QTNF4</i>      | Breast-Mammary-Tissue               | 2.92708043449e-06 |
| rs10838687 | ENSG00000172247 | <i>C1QTNF4</i>      | Colon-Transverse                    | 8.43183897696e-07 |
| rs10838687 | ENSG00000172247 | <i>C1QTNF4</i>      | Esophagus-Muscularis                | 8.79210389775e-07 |
| rs10838687 | ENSG00000172247 | <i>C1QTNF4</i>      | Muscle-Skeletal                     | 8.54914979219e-10 |
| rs10838687 | ENSG00000172247 | <i>C1QTNF4</i>      | Nerve-Tibial                        | 6.28029313008e-15 |
| rs10838687 | ENSG00000172247 | <i>C1QTNF4</i>      | Skin-Not-Sun-Exposed-Suprapubic     | 2.70064757209e-08 |
| rs10838687 | ENSG00000172247 | <i>C1QTNF4</i>      | Spleen                              | 5.88313478203e-10 |
| rs10838687 | ENSG00000172247 | <i>C1QTNF4</i>      | Whole-Blood                         | 1.62499001406e-07 |
| rs10838687 | ENSG00000175220 | <i>ARHGAP1</i>      | Esophagus-Muscularis                | 4.79345806147e-05 |
| rs10838687 | ENSG00000175220 | <i>ARHGAP1</i>      | Nerve-Tibial                        | 6.82296083501e-06 |
| rs10838687 | ENSG00000175220 | <i>ARHGAP1</i>      | Pancreas                            | 3.72698860395e-05 |
| rs10838687 | ENSG00000180210 | <i>F2</i>           | Esophagus-Gastroesophageal-Junction | 2.61053625474e-05 |
| rs10838687 | ENSG00000247675 | <i>LRP4-AS1</i>     | Nerve-Tibial                        | 6.77398621043e-14 |
| rs10838687 | ENSG00000247675 | <i>LRP4-AS1</i>     | Pancreas                            | 2.16806739278e-06 |
| rs10838687 | ENSG00000271350 | <i>CTD-2384B9.1</i> | Nerve-Tibial                        | 6.34706050202e-06 |
| rs10838687 | ENSG00000271350 | <i>CTD-2384B9.1</i> | Testis                              | 1.05240516036e-07 |
| rs10838687 | ENSG00000271557 | <i>YPEL5P2</i>      | Nerve-Tibial                        | 7.51699584443e-05 |
| rs11558471 | ENSG00000147677 | <i>EIF3H</i>        | Spleen                              | 3.9259893852e-05  |
| rs11558471 | ENSG00000164756 | <i>SLC30A8</i>      | Testis                              | 2.05616636527e-05 |
| rs11558471 | ENSG00000205002 | <i>AARD</i>         | Uterus                              | 2.36883921342e-05 |
| rs11603334 | ENSG00000110195 | <i>FOLR1</i>        | Testis                              | 7.40531340652e-05 |
| rs11603334 | ENSG00000137522 | <i>RNF121</i>       | Adipose-Subcutaneous                | 0.00012619795151  |
| rs11603334 | ENSG00000168010 | <i>ATG16L2</i>      | Cells-Transformed-fibroblasts       | 0.000103804026962 |
| rs11603334 | ENSG00000168010 | <i>ATG16L2</i>      | Pituitary                           | 9.57220796957e-09 |

|            |                 |                  |                                       |                   |
|------------|-----------------|------------------|---------------------------------------|-------------------|
| rs11603334 | ENSG00000186635 | <i>ARAP1</i>     | Brain-Hippocampus                     | 2.1792203294e-07  |
| rs11603334 | ENSG00000186635 | <i>ARAP1</i>     | Esophagus-Mucosa                      | 2.05283456439e-31 |
| rs11603334 | ENSG00000186635 | <i>ARAP1</i>     | Heart-Left-Ventricle                  | 9.45571405972e-05 |
| rs11603334 | ENSG00000186635 | <i>ARAP1</i>     | Pituitary                             | 3.85918791654e-05 |
| rs11603334 | ENSG00000186635 | <i>ARAP1</i>     | Skin-Not-Sun-Exposed-Suprapubic       | 4.26194524109e-15 |
| rs11603334 | ENSG00000186635 | <i>ARAP1</i>     | Skin-Sun-Exposed-Lower-leg            | 8.6753935429e-13  |
| rs11603334 | ENSG00000186635 | <i>ARAP1</i>     | Vagina                                | 2.13540139623e-06 |
| rs11603334 | ENSG00000186642 | <i>PDE2A</i>     | Pituitary                             | 1.53022140653e-05 |
| rs11603334 | ENSG00000214530 | <i>STARD10</i>   | Adipose-Subcutaneous                  | 1.40157404858e-22 |
| rs11603334 | ENSG00000214530 | <i>STARD10</i>   | Adipose-Visceral-Omentum              | 4.20018498505e-13 |
| rs11603334 | ENSG00000214530 | <i>STARD10</i>   | Adrenal-Gland                         | 1.68839708937e-05 |
| rs11603334 | ENSG00000214530 | <i>STARD10</i>   | Artery-Coronary                       | 3.46434620703e-07 |
| rs11603334 | ENSG00000214530 | <i>STARD10</i>   | Artery-Tibial                         | 1.80491817243e-19 |
| rs11603334 | ENSG00000214530 | <i>STARD10</i>   | Brain-Hippocampus                     | 6.91423944576e-13 |
| rs11603334 | ENSG00000214530 | <i>STARD10</i>   | Brain-Hypothalamus                    | 2.97445826171e-06 |
| rs11603334 | ENSG00000214530 | <i>STARD10</i>   | Brain-Nucleus-accumbens-basal-ganglia | 9.42264951173e-18 |
| rs11603334 | ENSG00000214530 | <i>STARD10</i>   | Brain-Putamen-basal-ganglia           | 2.11944255236e-10 |
| rs11603334 | ENSG00000214530 | <i>STARD10</i>   | Cells-Transformed-fibroblasts         | 1.10784037248e-22 |
| rs11603334 | ENSG00000214530 | <i>STARD10</i>   | Colon-Sigmoid                         | 9.66834209833e-05 |
| rs11603334 | ENSG00000214530 | <i>STARD10</i>   | Esophagus-Gastroesophageal-Junction   | 6.01227455154e-09 |
| rs11603334 | ENSG00000214530 | <i>STARD10</i>   | Esophagus-Mucosa                      | 9.98256950799e-08 |
| rs11603334 | ENSG00000214530 | <i>STARD10</i>   | Esophagus-Muscularis                  | 3.63061000798e-21 |
| rs11603334 | ENSG00000214530 | <i>STARD10</i>   | Heart-Atrial-Appendage                | 3.43706247956e-14 |
| rs11603334 | ENSG00000214530 | <i>STARD10</i>   | Heart-Left-Ventricle                  | 3.56243223152e-14 |
| rs11603334 | ENSG00000214530 | <i>STARD10</i>   | Muscle-Skeletal                       | 3.15486063502e-11 |
| rs11603334 | ENSG00000214530 | <i>STARD10</i>   | Nerve-Tibial                          | 8.025380066e-10   |
| rs11603334 | ENSG00000214530 | <i>STARD10</i>   | Skin-Not-Sun-Exposed-Suprapubic       | 1.09794276756e-06 |
| rs11603334 | ENSG00000214530 | <i>STARD10</i>   | Skin-Sun-Exposed-Lower-leg            | 1.77982862685e-12 |
| rs11603334 | ENSG00000214530 | <i>STARD10</i>   | Spleen                                | 6.24534239376e-06 |
| rs11603334 | ENSG00000214530 | <i>STARD10</i>   | Testis                                | 5.77727923768e-53 |
| rs11603334 | ENSG00000214530 | <i>STARD10</i>   | Thyroid                               | 1.68190571501e-21 |
| rs11603334 | ENSG00000214530 | <i>STARD10</i>   | Whole-Blood                           | 5.23070685799e-28 |
| rs11603334 | ENSG00000244134 | <i>RPS12P20</i>  | Testis                                | 3.07943415048e-05 |
| rs11603334 | ENSG00000245148 | <i>ARAP1-AS2</i> | Esophagus-Mucosa                      | 3.35542315417e-09 |
| rs11603334 | ENSG00000245148 | <i>ARAP1-AS2</i> | Esophagus-Muscularis                  | 0.000132342130158 |
| rs11603334 | ENSG00000245148 | <i>ARAP1-AS2</i> | Skin-Not-Sun-Exposed-Suprapubic       | 5.27971956062e-06 |

|            |                 |                      |                                 |                   |
|------------|-----------------|----------------------|---------------------------------|-------------------|
| rs11603334 | ENSG00000245148 | <i>ARAP1-AS2</i>     | Skin-Sun-Exposed-Lower-leg      | 9.86566634234e-07 |
| rs11603334 | ENSG00000256007 | <i>ARAP1-AS1</i>     | Esophagus-Mucosa                | 4.24608058891e-16 |
| rs11603334 | ENSG00000256007 | <i>ARAP1-AS1</i>     | Skin-Not-Sun-Exposed-Suprapubic | 2.9663658165e-10  |
| rs11603334 | ENSG00000256007 | <i>ARAP1-AS1</i>     | Skin-Sun-Exposed-Lower-leg      | 5.59749377236e-09 |
| rs11603334 | ENSG00000256007 | <i>ARAP1-AS1</i>     | Vagina                          | 1.58350657457e-05 |
| rs11603334 | ENSG00000256633 | <i>RP11-169D4.2</i>  | Pituitary                       | 1.23716646726e-05 |
| rs1549318  | ENSG00000137831 | <i>UACA</i>          | Adipose-Subcutaneous            | 7.62040217578e-05 |
| rs1549318  | ENSG00000137831 | <i>UACA</i>          | Colon-Transverse                | 1.50865490222e-07 |
| rs1549318  | ENSG00000137831 | <i>UACA</i>          | Esophagus-Muscularis            | 4.46725785788e-07 |
| rs1549318  | ENSG00000137831 | <i>UACA</i>          | Heart-Left-Ventricle            | 5.12002585695e-06 |
| rs1549318  | ENSG00000137831 | <i>UACA</i>          | Muscle-Skeletal                 | 1.47756162906e-07 |
| rs1549318  | ENSG00000137831 | <i>UACA</i>          | Nerve-Tibial                    | 7.28332565726e-07 |
| rs1549318  | ENSG00000166173 | <i>LARP6</i>         | Adipose-Subcutaneous            | 1.49001251151e-16 |
| rs1549318  | ENSG00000166173 | <i>LARP6</i>         | Adipose-Visceral-Omentum        | 3.71861526378e-05 |
| rs1549318  | ENSG00000166173 | <i>LARP6</i>         | Breast-Mammary-Tissue           | 3.01567496809e-10 |
| rs1549318  | ENSG00000166173 | <i>LARP6</i>         | Cells-Transformed-fibroblasts   | 9.21978432466e-07 |
| rs1549318  | ENSG00000235420 | <i>RPL29P30</i>      | Testis                          | 1.91179363617e-17 |
| rs4502156  | ENSG00000129003 | <i>VPS13C</i>        | Adipose-Subcutaneous            | 6.1378933828e-05  |
| rs4502156  | ENSG00000129003 | <i>VPS13C</i>        | Adipose-Visceral-Omentum        | 0.000118069002431 |
| rs4502156  | ENSG00000129003 | <i>VPS13C</i>        | Artery-Tibial                   | 7.16531122802e-05 |
| rs4502156  | ENSG00000129003 | <i>VPS13C</i>        | Breast-Mammary-Tissue           | 2.35245772991e-06 |
| rs4502156  | ENSG00000129003 | <i>VPS13C</i>        | Colon-Transverse                | 5.8663572571e-05  |
| rs4502156  | ENSG00000129003 | <i>VPS13C</i>        | Esophagus-Muscularis            | 9.70368440288e-06 |
| rs4502156  | ENSG00000129003 | <i>VPS13C</i>        | Lung                            | 1.04278737378e-05 |
| rs4502156  | ENSG00000129003 | <i>VPS13C</i>        | Nerve-Tibial                    | 5.62544360144e-13 |
| rs4502156  | ENSG00000129003 | <i>VPS13C</i>        | Skin-Not-Sun-Exposed-Suprapubic | 1.49754190539e-06 |
| rs4502156  | ENSG00000129003 | <i>VPS13C</i>        | Spleen                          | 4.11087561761e-06 |
| rs4502156  | ENSG00000129003 | <i>VPS13C</i>        | Whole-Blood                     | 8.48876714464e-14 |
| rs4502156  | ENSG00000166104 | <i>RP11-299H22.3</i> | Colon-Transverse                | 8.83954284179e-05 |
| rs4502156  | ENSG00000198535 | <i>C2CD4A</i>        | Brain-Hippocampus               | 6.59057183308e-05 |
| rs4502156  | ENSG00000198535 | <i>C2CD4A</i>        | Lung                            | 9.4578914753e-13  |
| rs4502156  | ENSG00000198535 | <i>C2CD4A</i>        | Nerve-Tibial                    | 0.000108136855995 |
| rs4502156  | ENSG00000259251 | <i>LOC101928907</i>  | Nerve-Tibial                    | 9.94052704877e-05 |
| rs4502156  | ENSG00000259498 | <i>RP11-244F12.3</i> | Muscle-Skeletal                 | 8.54339417378e-05 |
| rs4502156  | ENSG00000259675 | <i>RP11-507B12.1</i> | Vagina                          | 3.22452434691e-05 |
| rs4502156  | ENSG00000260062 | <i>GOLGA2P11</i>     | Pituitary                       | 0.000125427812608 |



|           |                 |                   |                                       |                   |
|-----------|-----------------|-------------------|---------------------------------------|-------------------|
| rs4790333 | ENSG00000070366 | <i>SMG6</i>       | Testis                                | 2.01796250091e-06 |
| rs4790333 | ENSG00000070444 | <i>MNT</i>        | Adipose-Subcutaneous                  | 4.53753966934e-08 |
| rs4790333 | ENSG00000070444 | <i>MNT</i>        | Adrenal-Gland                         | 6.77383628198e-05 |
| rs4790333 | ENSG00000070444 | <i>MNT</i>        | Lung                                  | 2.08911326634e-08 |
| rs4790333 | ENSG00000070444 | <i>MNT</i>        | Nerve-Tibial                          | 0.000123995238637 |
| rs4790333 | ENSG00000070444 | <i>MNT</i>        | Skin-Not-Sun-Exposed-Suprapubic       | 6.9348827878e-06  |
| rs4790333 | ENSG00000070444 | <i>MNT</i>        | Skin-Sun-Exposed-Lower-leg            | 1.41251332152e-10 |
| rs4790333 | ENSG00000070444 | <i>MNT</i>        | Testis                                | 1.82199043457e-05 |
| rs4790333 | ENSG00000070444 | <i>MNT</i>        | Thyroid                               | 2.8092498687e-05  |
| rs4790333 | ENSG00000070444 | <i>MNT</i>        | Whole-Blood                           | 6.69149421706e-10 |
| rs4790333 | ENSG00000074660 | <i>SCARF1</i>     | Breast-Mammary-Tissue                 | 5.81999912602e-05 |
| rs4790333 | ENSG00000108958 | <i>AC016292.3</i> | Artery-Tibial                         | 0.000120131601801 |
| rs4790333 | ENSG00000127804 | <i>METTL16</i>    | Muscle-Skeletal                       | 3.64473881672e-11 |
| rs4790333 | ENSG00000132359 | <i>RAP1GAP2</i>   | Uterus                                | 1.74458994676e-05 |
| rs4790333 | ENSG00000132376 | <i>INPP5K</i>     | Brain-Hypothalamus                    | 0.000105311720954 |
| rs4790333 | ENSG00000132376 | <i>INPP5K</i>     | Brain-Putamen-basal-ganglia           | 9.25511693927e-05 |
| rs4790333 | ENSG00000132386 | <i>SERPINF1</i>   | Brain-Nucleus-accumbens-basal-ganglia | 6.2230988248e-05  |
| rs4790333 | ENSG00000141258 | <i>SGSM2</i>      | Adipose-Subcutaneous                  | 1.87167531203e-10 |
| rs4790333 | ENSG00000141258 | <i>SGSM2</i>      | Artery-Tibial                         | 6.76272799246e-07 |
| rs4790333 | ENSG00000141258 | <i>SGSM2</i>      | Breast-Mammary-Tissue                 | 0.000100471127705 |
| rs4790333 | ENSG00000141258 | <i>SGSM2</i>      | Esophagus-Mucosa                      | 7.88667220572e-47 |
| rs4790333 | ENSG00000141258 | <i>SGSM2</i>      | Nerve-Tibial                          | 2.57641700445e-11 |
| rs4790333 | ENSG00000141258 | <i>SGSM2</i>      | Pancreas                              | 5.51821315507e-05 |
| rs4790333 | ENSG00000141258 | <i>SGSM2</i>      | Skin-Not-Sun-Exposed-Suprapubic       | 5.70294488579e-47 |
| rs4790333 | ENSG00000141258 | <i>SGSM2</i>      | Skin-Sun-Exposed-Lower-leg            | 5.39552112912e-75 |
| rs4790333 | ENSG00000141258 | <i>SGSM2</i>      | Thyroid                               | 1.03236535251e-12 |
| rs4790333 | ENSG00000167720 | <i>SRR</i>        | Adipose-Subcutaneous                  | 2.62770624435e-24 |
| rs4790333 | ENSG00000167720 | <i>SRR</i>        | Adipose-Visceral-Omentum              | 3.66599465005e-16 |
| rs4790333 | ENSG00000167720 | <i>SRR</i>        | Adrenal-Gland                         | 2.18813555214e-21 |
| rs4790333 | ENSG00000167720 | <i>SRR</i>        | Artery-Aorta                          | 1.5666233516e-27  |
| rs4790333 | ENSG00000167720 | <i>SRR</i>        | Artery-Tibial                         | 3.51909532525e-27 |
| rs4790333 | ENSG00000167720 | <i>SRR</i>        | Brain-Hippocampus                     | 1.96767876321e-06 |
| rs4790333 | ENSG00000167720 | <i>SRR</i>        | Breast-Mammary-Tissue                 | 5.98991547683e-23 |
| rs4790333 | ENSG00000167720 | <i>SRR</i>        | Cells-Transformed-fibroblasts         | 1.96530464307e-58 |
| rs4790333 | ENSG00000167720 | <i>SRR</i>        | Colon-Sigmoid                         | 4.711288685e-19   |
| rs4790333 | ENSG00000167720 | <i>SRR</i>        | Colon-Transverse                      | 8.86943187099e-14 |

|           |                 |                      |                                     |                   |
|-----------|-----------------|----------------------|-------------------------------------|-------------------|
| rs4790333 | ENSG00000167720 | <i>SRR</i>           | Esophagus-Gastroesophageal-Junction | 6.39417074123e-20 |
| rs4790333 | ENSG00000167720 | <i>SRR</i>           | Esophagus-Mucosa                    | 2.03191201428e-26 |
| rs4790333 | ENSG00000167720 | <i>SRR</i>           | Esophagus-Muscularis                | 4.63974738477e-35 |
| rs4790333 | ENSG00000167720 | <i>SRR</i>           | Heart-Atrial-Appendage              | 6.82859211342e-22 |
| rs4790333 | ENSG00000167720 | <i>SRR</i>           | Lung                                | 2.00383443438e-27 |
| rs4790333 | ENSG00000167720 | <i>SRR</i>           | Muscle-Skeletal                     | 1.1655201508e-40  |
| rs4790333 | ENSG00000167720 | <i>SRR</i>           | Nerve-Tibial                        | 2.01827714245e-13 |
| rs4790333 | ENSG00000167720 | <i>SRR</i>           | Pancreas                            | 4.61920620534e-11 |
| rs4790333 | ENSG00000167720 | <i>SRR</i>           | Prostate                            | 1.0414967858e-05  |
| rs4790333 | ENSG00000167720 | <i>SRR</i>           | Skin-Not-Sun-Exposed-Suprapubic     | 1.55125329116e-08 |
| rs4790333 | ENSG00000167720 | <i>SRR</i>           | Skin-Sun-Exposed-Lower-leg          | 5.80578214063e-15 |
| rs4790333 | ENSG00000167720 | <i>SRR</i>           | Small-Intestine-Terminal-Ileum      | 3.88146136704e-06 |
| rs4790333 | ENSG00000167720 | <i>SRR</i>           | Spleen                              | 5.78311512656e-06 |
| rs4790333 | ENSG00000167720 | <i>SRR</i>           | Stomach                             | 9.93468115975e-28 |
| rs4790333 | ENSG00000167720 | <i>SRR</i>           | Testis                              | 5.68574604246e-10 |
| rs4790333 | ENSG00000167720 | <i>SRR</i>           | Thyroid                             | 3.04088943829e-29 |
| rs4790333 | ENSG00000167720 | <i>SRR</i>           | Uterus                              | 2.31653846137e-05 |
| rs4790333 | ENSG00000167720 | <i>SRR</i>           | Vagina                              | 0.000128293539354 |
| rs4790333 | ENSG00000167720 | <i>SRR</i>           | Whole-Blood                         | 2.63403824064e-12 |
| rs4790333 | ENSG00000167721 | <i>TSR1</i>          | Esophagus-Mucosa                    | 3.19159108277e-07 |
| rs4790333 | ENSG00000167721 | <i>TSR1</i>          | Skin-Not-Sun-Exposed-Suprapubic     | 1.78661783865e-06 |
| rs4790333 | ENSG00000167721 | <i>TSR1</i>          | Skin-Sun-Exposed-Lower-leg          | 2.90773079263e-12 |
| rs4790333 | ENSG00000185924 | <i>RTN4RL1</i>       | Prostate                            | 4.33826055896e-05 |
| rs4790333 | ENSG00000197879 | <i>MYO1C</i>         | Pituitary                           | 4.94222032517e-05 |
| rs4790333 | ENSG00000236838 | <i>AC090617.1</i>    | Testis                              | 4.05530839887e-11 |
| rs4790333 | ENSG00000239884 | <i>RN7SL608P</i>     | Adrenal-Gland                       | 1.25431983335e-05 |
| rs4790333 | ENSG00000262333 | <i>HNRNPA1P16</i>    | Pancreas                            | 4.41628579011e-05 |
| rs4790333 | ENSG00000262456 | <i>RP1-59D14.1</i>   | Adipose-Subcutaneous                | 1.9273076244e-05  |
| rs4790333 | ENSG00000262456 | <i>RP1-59D14.1</i>   | Lung                                | 1.62943932639e-05 |
| rs4790333 | ENSG00000262456 | <i>RP1-59D14.1</i>   | Skin-Not-Sun-Exposed-Suprapubic     | 3.79534080211e-05 |
| rs4790333 | ENSG00000262456 | <i>RP1-59D14.1</i>   | Skin-Sun-Exposed-Lower-leg          | 3.03752617814e-09 |
| rs4790333 | ENSG00000262456 | <i>RP1-59D14.1</i>   | Whole-Blood                         | 5.09383256186e-08 |
| rs4790333 | ENSG00000262533 | <i>RP11-667K14.4</i> | Esophagus-Muscularis                | 3.34437203641e-07 |
| rs4790333 | ENSG00000262533 | <i>RP11-667K14.4</i> | Thyroid                             | 6.46727494394e-05 |
| rs4790333 | ENSG00000262884 | <i>LOC101927911</i>  | Adrenal-Gland                       | 2.38261550886e-05 |
| rs4790333 | ENSG00000263345 | <i>RP1-59D14.5</i>   | Adipose-Subcutaneous                | 1.5906942067e-08  |

|           |                 |                      |                                     |                   |
|-----------|-----------------|----------------------|-------------------------------------|-------------------|
| rs4790333 | ENSG00000263345 | <i>RP1-59D14.5</i>   | Adipose-Visceral-Omentum            | 1.20925708546e-05 |
| rs4790333 | ENSG00000263345 | <i>RP1-59D14.5</i>   | Artery-Aorta                        | 2.64778354704e-06 |
| rs4790333 | ENSG00000263345 | <i>RP1-59D14.5</i>   | Artery-Tibial                       | 8.30712895499e-11 |
| rs4790333 | ENSG00000263345 | <i>RP1-59D14.5</i>   | Breast-Mammary-Tissue               | 3.8474954638e-06  |
| rs4790333 | ENSG00000263345 | <i>RP1-59D14.5</i>   | Cells-Transformed-fibroblasts       | 0.000103815497139 |
| rs4790333 | ENSG00000263345 | <i>RP1-59D14.5</i>   | Colon-Sigmoid                       | 1.0110430983e-07  |
| rs4790333 | ENSG00000263345 | <i>RP1-59D14.5</i>   | Colon-Transverse                    | 6.59603168599e-07 |
| rs4790333 | ENSG00000263345 | <i>RP1-59D14.5</i>   | Esophagus-Gastroesophageal-Junction | 1.17031329814e-05 |
| rs4790333 | ENSG00000263345 | <i>RP1-59D14.5</i>   | Esophagus-Mucosa                    | 4.69921628394e-17 |
| rs4790333 | ENSG00000263345 | <i>RP1-59D14.5</i>   | Esophagus-Muscularis                | 2.28617562809e-08 |
| rs4790333 | ENSG00000263345 | <i>RP1-59D14.5</i>   | Lung                                | 1.14149548548e-08 |
| rs4790333 | ENSG00000263345 | <i>RP1-59D14.5</i>   | Muscle-Skeletal                     | 8.41241468254e-05 |
| rs4790333 | ENSG00000263345 | <i>RP1-59D14.5</i>   | Nerve-Tibial                        | 2.09575325565e-09 |
| rs4790333 | ENSG00000263345 | <i>RP1-59D14.5</i>   | Pancreas                            | 1.91973455846e-07 |
| rs4790333 | ENSG00000263345 | <i>RP1-59D14.5</i>   | Skin-Not-Sun-Exposed-Suprapubic     | 6.38363784966e-20 |
| rs4790333 | ENSG00000263345 | <i>RP1-59D14.5</i>   | Skin-Sun-Exposed-Lower-leg          | 2.24221376177e-41 |
| rs4790333 | ENSG00000263345 | <i>RP1-59D14.5</i>   | Small-Intestine-Terminal-Ileum      | 4.41741438412e-05 |
| rs4790333 | ENSG00000263345 | <i>RP1-59D14.5</i>   | Stomach                             | 2.88769867873e-06 |
| rs4790333 | ENSG00000263345 | <i>RP1-59D14.5</i>   | Thyroid                             | 5.00865925951e-17 |
| rs4790333 | ENSG00000272911 | <i>RP11-74E22.6</i>  | Thyroid                             | 2.08968750769e-05 |
| rs6235    | ENSG00000164292 | <i>RHOBTB3</i>       | Muscle-Skeletal                     | 7.32402521053e-07 |
| rs6235    | ENSG00000164308 | <i>ERAP2</i>         | Lung                                | 6.94383289294e-06 |
| rs6235    | ENSG00000164308 | <i>ERAP2</i>         | Muscle-Skeletal                     | 7.08184188823e-06 |
| rs6235    | ENSG00000175426 | <i>PCSK1</i>         | Adipose-Subcutaneous                | 1.86595194529e-05 |
| rs6235    | ENSG00000175426 | <i>PCSK1</i>         | Adipose-Visceral-Omentum            | 2.25873475953e-05 |
| rs6235    | ENSG00000175426 | <i>PCSK1</i>         | Artery-Aorta                        | 7.48841603785e-05 |
| rs6235    | ENSG00000175426 | <i>PCSK1</i>         | Artery-Tibial                       | 7.7780236049e-09  |
| rs6235    | ENSG00000175426 | <i>PCSK1</i>         | Muscle-Skeletal                     | 1.99497206617e-05 |
| rs6235    | ENSG00000175426 | <i>PCSK1</i>         | Nerve-Tibial                        | 2.47059964991e-05 |
| rs6235    | ENSG00000249746 | <i>RP11-254I22.3</i> | Liver                               | 1.15708047575e-05 |
| rs6235    | ENSG00000251000 | <i>AC008592.3</i>    | Small-Intestine-Terminal-Ileum      | 5.59609886091e-05 |
| rs7903146 | ENSG00000119927 | <i>GPAM</i>          | Uterus                              | 0.000105881315055 |
| rs7903146 | ENSG00000148737 | <i>TCF7L2</i>        | Artery-Aorta                        | 2.41309804086e-08 |
| rs7903146 | ENSG00000148737 | <i>TCF7L2</i>        | Cells-Transformed-fibroblasts       | 4.9364884775e-05  |
| rs7903146 | ENSG00000151532 | <i>VTI1A</i>         | Nerve-Tibial                        | 0.000126683454415 |
| rs7903146 | ENSG00000165806 | <i>CASP7</i>         | Pancreas                            | 0.000106676244722 |

|           |                 |                     |                                     |                   |
|-----------|-----------------|---------------------|-------------------------------------|-------------------|
| rs7903146 | ENSG00000165806 | <i>CASP7</i>        | Uterus                              | 1.928007398e-05   |
| rs7903146 | ENSG00000197142 | <i>ACSL5</i>        | Muscle-Skeletal                     | 8.30564397475e-05 |
| rs7903146 | ENSG00000197893 | <i>NRAP</i>         | Pancreas                            | 5.87163857808e-05 |
| rs7903146 | ENSG00000233547 | <i>RP11-57H14.2</i> | Adipose-Subcutaneous                | 8.01903050249e-06 |
| rs7903146 | ENSG00000233547 | <i>RP11-57H14.2</i> | Adipose-Visceral-Omentum            | 0.000116670281781 |
| rs7903146 | ENSG00000233547 | <i>RP11-57H14.2</i> | Artery-Coronary                     | 7.52881713657e-05 |
| rs7903146 | ENSG00000233547 | <i>RP11-57H14.2</i> | Artery-Tibial                       | 8.49093176404e-06 |
| rs7903146 | ENSG00000233547 | <i>RP11-57H14.2</i> | Breast-Mammary-Tissue               | 1.57494777667e-07 |
| rs7903146 | ENSG00000233547 | <i>RP11-57H14.2</i> | Cells-Transformed-fibroblasts       | 2.20760403394e-05 |
| rs7903146 | ENSG00000233547 | <i>RP11-57H14.2</i> | Colon-Sigmoid                       | 1.70252542602e-06 |
| rs7903146 | ENSG00000233547 | <i>RP11-57H14.2</i> | Colon-Transverse                    | 1.4331889962e-06  |
| rs7903146 | ENSG00000233547 | <i>RP11-57H14.2</i> | Esophagus-Gastroesophageal-Junction | 3.46354862923e-08 |
| rs7903146 | ENSG00000233547 | <i>RP11-57H14.2</i> | Esophagus-Mucosa                    | 2.87613838631e-07 |
| rs7903146 | ENSG00000233547 | <i>RP11-57H14.2</i> | Esophagus-Muscularis                | 1.21308084669e-14 |
| rs7903146 | ENSG00000233547 | <i>RP11-57H14.2</i> | Lung                                | 4.8139851224e-13  |
| rs7903146 | ENSG00000233547 | <i>RP11-57H14.2</i> | Muscle-Skeletal                     | 3.3063719769e-09  |
| rs7903146 | ENSG00000233547 | <i>RP11-57H14.2</i> | Nerve-Tibial                        | 7.92423442978e-33 |
| rs7903146 | ENSG00000233547 | <i>RP11-57H14.2</i> | Ovary                               | 6.58528159444e-07 |
| rs7903146 | ENSG00000233547 | <i>RP11-57H14.2</i> | Pituitary                           | 4.84808780686e-10 |
| rs7903146 | ENSG00000233547 | <i>RP11-57H14.2</i> | Prostate                            | 3.55202963832e-10 |
| rs7903146 | ENSG00000233547 | <i>RP11-57H14.2</i> | Skin-Not-Sun-Exposed-Suprapubic     | 3.2118971947e-06  |
| rs7903146 | ENSG00000233547 | <i>RP11-57H14.2</i> | Skin-Sun-Exposed-Lower-leg          | 8.31064590167e-07 |
| rs7903146 | ENSG00000233547 | <i>RP11-57H14.2</i> | Testis                              | 1.00946591504e-05 |
| rs7903146 | ENSG00000233547 | <i>RP11-57H14.2</i> | Thyroid                             | 4.80328361344e-11 |
| rs7903146 | ENSG00000233547 | <i>RP11-57H14.2</i> | Uterus                              | 2.18871343943e-05 |
| rs7903146 | ENSG00000233547 | <i>RP11-57H14.2</i> | Vagina                              | 7.31216360291e-06 |
| rs7903146 | ENSG00000233547 | <i>RP11-57H14.2</i> | Whole-Blood                         | 3.19447612908e-10 |
| rs9727115 | ENSG00000117598 | <i>PLPPR5</i>       | Testis                              | 1.37817618778e-05 |
| rs9727115 | ENSG00000117600 | <i>PLPPR4</i>       | Cells-Transformed-fibroblasts       | 2.47272652341e-05 |
| rs9727115 | ENSG00000162627 | <i>SNX7</i>         | Adipose-Subcutaneous                | 3.10423023004e-06 |
| rs9727115 | ENSG00000162627 | <i>SNX7</i>         | Adipose-Visceral-Omentum            | 0.000119457641076 |
| rs9727115 | ENSG00000162627 | <i>SNX7</i>         | Artery-Aorta                        | 3.27419942829e-14 |
| rs9727115 | ENSG00000162627 | <i>SNX7</i>         | Artery-Tibial                       | 2.8535505536e-06  |
| rs9727115 | ENSG00000162627 | <i>SNX7</i>         | Cells-Transformed-fibroblasts       | 5.90947269828e-11 |
| rs9727115 | ENSG00000162627 | <i>SNX7</i>         | Esophagus-Muscularis                | 9.66559107291e-06 |
| rs9727115 | ENSG00000162627 | <i>SNX7</i>         | Heart-Left-Ventricle                | 3.72055920472e-05 |

|           |                 |             |                                 |                   |
|-----------|-----------------|-------------|---------------------------------|-------------------|
| rs9727115 | ENSG00000162627 | <i>SNX7</i> | Lung                            | 3.60279212263e-10 |
| rs9727115 | ENSG00000162627 | <i>SNX7</i> | Nerve-Tibial                    | 7.07821490358e-10 |
| rs9727115 | ENSG00000162627 | <i>SNX7</i> | Skin-Not-Sun-Exposed-Suprapubic | 4.63114014753e-07 |
| rs9727115 | ENSG00000162627 | <i>SNX7</i> | Skin-Sun-Exposed-Lower-leg      | 2.9230712805e-07  |
| rs9727115 | ENSG00000162627 | <i>SNX7</i> | Spleen                          | 7.04657413939e-16 |
| rs9727115 | ENSG00000162627 | <i>SNX7</i> | Thyroid                         | 1.1784762688e-08  |
| rs9727115 | ENSG00000162627 | <i>SNX7</i> | Whole-Blood                     | 1.35173975707e-15 |
